## SUBJECT INDEX TO VOLUME 75

Entries from Journal departments are identified as follows: Book Reviews—(BR); Case Reports—(CR); Clinical Investigations—(CI); Correspondence—(CO); Editorial Views—(EV); Laboratory Investigations—(LI); Laboratory Reports—(LR); Review Article—(RA); Medical Intelligence—(MI); Special Article—(SA); Reports of Scientific Meetings—(SM).

### A

- Abdominal surgery, See under Surgery**  
**Abscess, See under Complications**  
**Acetylcholine, See under Parasympathetic nervous system**  
 $\alpha_1$ -Acid glycoprotein, *See under Pharmacokinetics*  
**Additivity, See under Interactions**  
**Adenosine, See under Pharmacology**  
**Adrenal hormones, See under Hormones**  
**Adrenal medulla, See under Kidney**  
 $\alpha_2$ -Adrenergic agonists, *See under Sympathetic nervous system;  $\alpha_2$ -adrenergic agonists*  
**Adrenergic agonists, See under Sympathetic nervous system**  
 $\alpha_1$ -Adrenergic antagonists, *See under Sympathetic nervous system*  
 $\alpha$ -Adrenergic receptor agonists, *See under Sympathetic nervous system*  
 $\alpha_2$ -Adrenergic receptors, *See under Receptors*  
 $\alpha$ -Adrenergic receptors, *See under Receptors*  
**Adrenergic receptors, See under Receptors**  
**Advertising**  
     **truth in**  
         as responsibility of the *Journal of Anesthesiology* (CO) [Atkins], 547  
         as responsibility of the *Journal of Anesthesiology* (CO) [Zapol], 547  
 $\alpha_2$  Agonists, *See under Receptors*  
**Air embolism, See under Embolism**  
**Air entrainment, See under Complications**  
**Airway**  
     **bronchial rings**  
         in study of bronchodilation and airway epithelium (LI) [Sayiner, Lorenz, Warner & Rehder], 75  
     **bronchial segments**  
         canine  
             in study of bronchodilation and airway epithelium (LI) [Sayiner, Lorenz, Warner & Rehder], 75  
     **complications, See under Complications**  
     **epithelium-derived relaxing factor**  
         in study of bronchodilation and airway epithelium (LI) [Sayiner, Lorenz, Warner & Rehder], 75  
     **extubation**  
         intractable pharyngeal spasm following, in undiagnosed tetanus (CR) [Baronia, Singh & Dhiman], 1111  
         in management of difficult adult airway (MI) [Benumof], 1087  
     **local anesthesia**  
         in management of difficult adult airway (MI) [Benumof], 1087  
     **management**  
         difficult, in adult (MI) [Benumof], 1087  
     **obstruction**  
         upper  
             another cause of (CO) [Hatanaka & Yamashita], 1117  
             infrequently leading to malpractice suits (CI) [Cheney, Posner & Caplan], 932  
             after three sufentanil-pancuronium induction sequences (CI) [Horror, Abrams, Van Riper, Lambson & Storella], 969  
         pressure  
             after three sufentanil-pancuronium induction sequences (CI) [Horror, Abrams, Van Riper, Lambson & Storella], 969  
     **trachea**  
         constriction  
             guinea pigs, in response to oxybarbiturates and thiobarbiturates (LI) [Curry, Lenox, Spannhake & Hirshman], 679  
         extubation  
             transparent dressing is useful for secure fixation of endotracheal tube (CO) [Mikawa, Maekawa, Goto, Yaku & Obara], 1123  
     **tracheal**  
         extubation  
             in children (CO) [Jacka & Froese], 546  
             in children (CO) [Pounder, Blackstock & Steward], 546  
     **tracheal stenosis**  
         congenital  
             use of laryngeal mask in child with (CR) [Asai, Fujise & Uchida], 903  
     **trauma**  
         infrequently leading to malpractice suits (CI) [Cheney, Posner & Caplan], 932  
**Airway pressure, See under Airway; Ventilation**  
**Alarms, See under Equipment**  
**Alfentanil, See under Analgesics, opioid; Anesthetics, intravenous; Metabolism**  
**Allergy**  
     **anaphylaxis**  
         during anesthesia (CO) [Levy], 712  
         during anesthesia: radioimmunoassays to determine etiology and drugs responsible in fatal cases (CR) [Fisher, Baldo & Silbert], 1112  
**American Society of Anesthesiologists, See under Organizations**  
**Amiodarone, See under Sympathetic nervous system, sympatholytic agents**  
**Ampules, See under Equipment**  
**Amrinone, See under Pharmacology**  
**Analgesia**  
     **epidural**  
         does not obscure diagnosis of compartment syndrome from prolonged lithotomy position (CR) [Montgomery & Ready], 541  
     **opioid**  
         does not obscure diagnosis of compartment syndrome from prolonged lithotomy position (CR) [Montgomery & Ready], 541  
     **patient-controlled**  
         machine tampering, "air in the syringe" (CR) [Stevens, Cohen, Kanzaria & Dunn], 697  
     **postoperative**  
         alfentanil for: epidural *versus* intravenous routes (CI) [Camu & Debucquoy], 171  
         epidural morphine is safe on surgical wards (CI) [Ready, Loper, Nessly & Wild], 452  
         epidural *versus* intravenous fentanyl for (CI) [Salomäki, Laitinen & Nuutinen], 790

does not obscure diagnosis of compartment syndrome from prolonged lithotomy position (CR) [Montgomery & Ready], 541  
oral transmucosal fentanyl for (CI) [Streisand, Varvel, Stanski, LeMaire, Ashburn, Hague, Tarver & Stanley], 223  
and isoflurane and dexmedetomidine in spinal cord (LI) [Savola, Woodley, Maze & Kendig], 489  
and spinal pharmacology of hyperesthesia (LI) [Yamamoto & Yaksh], 817

## Analgesics

### epidural

#### fentanyl

for analgesia after thoracotomy, in comparative study (CI) [Salomäki, Laitinen & Nuutinen], 790

#### fentanyl

pharmacokinetics of, effects of epidural clonidine on, in postoperative patients (CI) [Rostaing, Bonnet, Levron, Vodinh, Pluskwa & Saada], 420

### intrathecal

#### morphine

as cause of herpes simplex should be scratched out (CO) [Abouleish], 919

as cause of herpes simplex should be scratched out (CO) [Pennant & Wallace], 920

and reactivation of oral herpes simplex (CO) [Pennant & Wallace], 167

and somatosensory evoked potentials in awake humans (CI) [Schubert, Licina, Lineberry & Deers], 401

### intravenous

#### fentanyl

for analgesia after thoracotomy, in comparative study (CI) [Salomäki, Laitinen & Nuutinen], 790

### morphine

or nalbuphine, after thoracotomy (CI) [Etches, Sandler & Lawson], 9

in study of intravenous clonidine for postoperative analgesia (CI) [Bernard, Hommeril, Passuti & Pinaud], 577

### nalbuphine

or morphine, after thoracotomy (CI) [Etches, Sandler & Lawson], 9

### opioid

#### alfentanil

acute tolerance to, is not related to their potency (LI) [Kissin, Brown & Bradley], 813

epidural versus intravenous, for postoperative pain (CI) [Camu & Debucquoy], 171

#### butorphanol

behavioral and histopathologic effects following intrathecal administration of, in sheep (LI) [Rawal, Nuutinen, Raj, Lovering, Gobuty, Hagardine, Lehmkuhl, Herva & Abouleish], 1025

#### fentanyl

and spinal nerve root sleeve permeability (LI) [Bernards & Hill], 827

#### morphine

acute tolerance to, is not related to their potency (LI) [Kissin, Brown & Bradley], 813

and spinal nerve root sleeve permeability (LI) [Bernards & Hill], 827

#### nalbuphine

behavioral and histopathologic effects following intrathecal administration of, in sheep (LI) [Rawal, Nuutinen, Raj, Lovering, Gobuty, Hagardine, Lehmkuhl, Herva & Abouleish], 1025

### sufentanil

acute tolerance to, is not related to their potency (LI) [Kissin, Brown & Bradley], 813

behavioral and histopathologic effects following intrathecal administration of, in sheep (LI) [Rawal, Nuutinen, Raj, Lovering, Gobuty, Hagardine, Lehmkuhl, Herva & Abouleish], 1025

pancuronium induction sequences, ventilatory compliance after (CI) [Horrow, Abrams, Van Riper, Lambson & Storcella], 969

and burning pain of Guillain-Barré syndrome (CO) [Ennis], 913

and burning pain of Guillain-Barré syndrome (CO) [Warfield], 914

and patient-controlled analgesia machine tampering (CR) [Stevens, Cohen, Kanzaria & Dunn], 697

### opioid(s)

#### intrathecal

respiratory depression following (CO) [Eisenach], 712

### opioids

#### morphine

is safe on surgical wards (CI) [Ready, Loper, Nessly & Wild], 452

pharmacokinetics of, effects of epidural clonidine on, in postoperative patients (CI) [Rostaing, Bonnet, Levron, Vodinh, Pluskwa & Saada], 420

**Anaphylactoid response, See under Immune response**

**Anaphylaxis, See under Allergy**

## Anatomy

### neck

#### extension

in management of difficult adult airway (MI) [Benumof], 1087

#### flexion

in management of difficult adult airway (MI) [Benumof], 1087

### spine

#### epidural (CI) [Hogan], 767

lumbosacral anomalies of, congenital, epidural analgesia in (CR) [Cooper & Smith], 370

**Anemia, See under Blood; Complications**

## Anesthesia

**anaphylaxis during (CO) [Levy], 712**

### cardiac

#### vascular

and right- and left-arm blood pressure discrepancies in vascular surgery patients (CI) [Frank, Norris, Christopherson & Beatie], 457

during cardiac surgery, pharmacokinetics of amrinone and (CI) [Bailey, Levy, Rogers, Szlam & Hug], 961

external compression of abdominal aorta reversing Tetralogy of Fallot cyanotic crisis during (CR) [Baele, Rennotte & Veyckemans], 146

### cardiovascular

and cerebral blood flow response to carbon dioxide during hypothermic bypass (LI) [Hindman, Funatsu, Harrington, Cutkomp, Dexter, Todd & Tinker], 662

comparison of desflurane and isoflurane in (CI) [Thomson, Bowring, Hudson, Fraix & Rosenbloom], 776

and hemodynamic actions of D- and L-medetomidine (LI) [Schmeling, Kampine, Roerig & Warltier], 499

### depth

#### awareness

therapeutic suggestions for improved, during general anesthesia (CI) [Block, Ghoneim, Ping & Ali], 746

- learning  
therapeutic suggestions for improved, during general anesthesia (CI) [Block, Ghoneim, Ping & Ali], 746
- pentobarbital  
influence of cryogenic brain injury on (LI) [Archer, Priddy, Tang, Sabourin & Samanani], 634
- recall  
therapeutic suggestions for improved, during general anesthesia (CI) [Block, Ghoneim, Ping & Ali], 746
- general**  
central thermoregulatory inhibition by (EV) [Sessler], 557  
and finger blood pressure and controlled hypotension (CI) [Epstein, Bartkowski & Huffman], 796  
and isoflurane and dexmedetomidine in spinal cord (LI) [Savola, Woodley, Maze & Kendig], 489  
spastic torticollis during (CR) [Stemp & Taswell], 365  
*versus* epidural and general anesthesia for abdominal aortic surgery (CI) [Baron, Bertrand, Barré, Godet, Mundler, Coriat & Viars], 611
- neonatal**  
in premature infants, association of postoperative apnea, airway obstruction, and hypoxemia (CI) [Kurth & LeBard], 22
- neurosurgical**  
and quadriplegia in patient with cervical spondylosis after, in prone position (CR) [Deem, Shapiro & Marshall], 527
- obstetric**  
and fetal heart rate after epidural anesthesia (CI) [Loftus, Holbrook & Cohen], 406  
magnesium sulfate and vasopressors (LI) [Sipes, Chestnut, Vincent, Weiner, Thompson & Chatterjee], 1010  
management of congestive heart failure during, in patient with myotonic dystrophy (CR) [Dodds, Haney & Appleton], 907  
systemic toxicity of ropivacaine during ovine pregnancy (LI) [Santos, Arthur, Pedersen, Morishima, Finster & Covino], 137
- outpatient**  
desflurane for (CI) [Hemelrijck, Smith & White], 197
- pediatric**  
and cause for hemodynamic instability during hepatic tumor resection (CO) [Riegler, Hirshberg & Ternberg], 381  
Larsen's syndrome  
anesthetic considerations in (CR) [Stevenson, Hall & Palmieri], 142
- neonates**  
and anesthesiologists assessment of changes in neonatal pulmonary compliance by "educated hand" (LR) [Spears, Yeh, Fisher & Zwass], 693  
aids for fiberoptically guided intubation in (CO) [Wilton], 549  
and anemia in pediatric day-surgery patients (CI) [Hackmann, Steward & Sheps], 27  
contribution of nitrous oxide to isoflurane MAC in children (CI) [Murray, Mehta & Forbes], 186  
dose-response to atropine in (CI) [Palmisano, Setlock, Brown, Siker & Tripuraneni], 238  
and educated hand of pediatric anesthesiologist (EV) [Steward], 555  
epidural, in congenital lumbosacral spine anomalies (CR) [Cooper & Smith], 370  
external compression of abdominal aorta reversing Tetralogy of Fallot cyanotic crisis during (CR) [Baele, Rennotte & Veyckemans], 146  
laryngeal mask for fiberoptic airway endoscopy in (CO) [Mae-kawa, Mikawa, Tanaka, Goto & Obara], 169  
minimum alveolar concentration of desflurane and hemodynamic responses in (CI) [Taylor & Lerman], 975  
optimum concentration of bupivacaine for (CI) [Gunter, Dunn, Bennie, Pentecost, Bower & Ternberg], 57  
phenol motor point blocks in children: plasma concentrations and cardiac dysrhythmias (CR) [Morrison, Matthews, Washington, Fennessey & Harrison], 359  
and postintubation croup in children (CO) [Litman & Keon], 1122  
postoperative apnea in full-term infant (CO) [Karayan, LaCoste & Fuscicardi], 375  
in premature infants, association of postoperative apnea, airway obstruction, and hypoxemia (CI) [Kurth & LeBard], 22  
using sevoflurane, malignant hyperthermia, in child with central core disease (CR) [Otsuka, Komura, Mayumi, Yamamura, Kemmotsu & Mukaida], 699  
spinal anesthesia in infants: could L5-S1 approach be safer? (CO) [Busoni & Messeri], 168  
spinal anesthesia in infants: could L5-S1 approach be safer? (CO) [Orr & Haberkern], 169  
for strabismus surgery, effect of propofol on postoperative vomiting after (CI) [Watcha, Simeon, White & Stevens], 204  
tracheal extubation in (CO) [Jacka & Froese], 546  
tracheal extubation in (CO) [Pounder, Blackstock & Steward], 546
- preoperative evaluation**  
automated interview in, *versus* personal interview (CI) [Lutner, Roizen, Stocking, Thisted, Kim, Duke, Pompei & Cassel], 394
- regional**  
effects on peripheral nerve blood flow on (LI) [Partridge], 243  
lumbar epidural (CI) [Hogan], 767  
phenol motor point blocks in children: plasma concentrations and cardiac dysrhythmias (CR) [Morrison, Matthews, Washington, Fennessey & Harrison], 359
- thoracic**  
epidural nalbuphine or morphine after thoracotomy (CI) [Etches, Sandler & Lawson], 9
- urologic**  
and life-threatening hypoxemia after lithotripsy (CR) [Malhotra, Rosen & Slepian], 529  
anaphylaxis during (CO) [Eisenach], 712  
"do-not-resuscitate" orders during (CO) [Daly & Seravalli], 709  
"do-not-resuscitate" orders during (CO) [Truog], 710
- Anesthesia equipment, See under Equipment**
- Anesthesia machines, See under Equipment**
- Anesthesiologist(s)**  
pediatric, "not-so-educated hand" of (EV) [Steward], 555
- Anesthesiology**  
application of molecular genetics to (CO) [Lightstone], 1126
- Anesthetic techniques**
- balanced**  
neuromuscular effects of ORG9426 in patients receiving (CI) [Foldes, Nagashima, Nguyen, Schiller, Mason & Ohta], 191
- bronchoscopy**  
fiberoptic  
in pediatric anesthesia, laryngeal mask for airway for CO [Mae-kawa, Mikawa, Tanaka, Goto & Obara], 169
- caudal**  
epidural  
optimum concentration of bupivacaine for (CI) [Gunter, Dunn, Bennie, Pentecost, Bower & Ternberg], 57
- celiac plexus block**  
treatment of benign chronic abdominal pain with (CR) [Hastings & McKay], 156

**closed-circuit**

- system model for (LR) [Lerou, Dirksen, Beneken Kolmer & Booi], 345
- system model for, clinical evaluation of (CI) [Lerou, Dirksen, Beneken Kolmer, Booi & Borm], 230

**continuous infusion**

- of propofol for strabismus surgery, and emesis (CI) [Watcha, Simeon, White & Stevens], 204

**epidural**

- for alfentanil infusion for postoperative pain (CI) [Camu & Debucquoy], 171
- n-butyl-p-aminobenzoate in, in intractable cancer pain (CI) [Korsten, Ackerman, Grouls, van Zundert, Bon, Bal, Crommelin, Ribot, Hoefsloot & Sloff], 950
- clonidine in, and fentanyl (CI) [Rostaing, Bonnet, Levron, Voudin, Pluskwa & Saada], 420
- in congenital lumbosacral spinal anomalies (CR) [Cooper & Smith], 370
- epidural abscess associated with (CO) [Strong], 709
- epidural abscess associated with (CO) [Waldman], 708
- fetal heart rate after (CI) [Loftus, Holbrook & Cohen], 406
- and general anesthesia *versus* general anesthesia for abdominal aortic surgery (CI) [Baron, Bertrand, Barré, Godet, Mundler, Coriat & Viars], 611
- lumbar anatomy and (CI) [Hogan], 767
- nalbuphine or morphine, in postthoracotomy patients (CI) [Etches, Sandler & Lawson], 9
- observation of spinal canal and cisternae with flexible fiberoptic during (LR) [Shimoji, Fujioka, Onodera, Hokari, Fukuda, Fujiwara & Hatori], 341
- postoperative, morphine in, is safe on surgical wards (CI) [Ready, Loper, Nessly & Wild], 452
- proper needle size for performing (CO) [Goffen], 166
- proper needle size for performing (CO) [Jackson & Rauck], 166
- spinal or epidural catheters in, difficult to remove, approach to (CO) [Gravenstein, Blackshear & Wissler], 544
- versus* intravenous, fentanyl in, for pain relief (CI) [Salomäki, Laitinen & Nuutinen], 790

**epidural blood patch**

- in post-dural puncture complication (CO) [Kelly, Boyd & Plagenhoff], 548
- to resolve postmyelogram headache (CR) [Parlow & Einarson], 145

**fiberoptic intubation**

- aids for, in children (CO) [Wilton], 549

**hypotension, induced**

- controlled
  - continuous noninvasive finger blood pressure during (CI) [Epstein, Bartkowski & Huffnagle], 796

**inhalational**

- desflurane in, for outpatient anesthesia (CI) [Hemelrijck, Smith & White], 197
- of propofol for strabismus surgery, and emesis (CI) [Watcha, Simeon, White & Stevens], 204

**internal jugular vein cannulation**

- percutaneous puncture of vein using continuously transduced pressure (CO) [Mangar & Connell], 383

**internal jugular vein catheterization**

- risk of, does systematic anticoagulation increase? (CO) [Peterson], 1124

**intravenous**

- for alfentanil infusion for postoperative pain (CI) [Camu & Debucquoy], 171
- desflurane in, for outpatient anesthesia (CI) [Hemelrijck, Smith & White], 197

**low-flow**

- for xenon anesthesia (LR) [Luttrupp, Rydgren, Thomasson & Werner], 896

**motor point block**

- phenol for, in children (CR) [Morrison, Matthews, Washington, Fennessey & Harrison], 359

**one-lung ventilation**

- Univent® tube for bronchial cuff inflation in (CO) [Hannallah], 165

**pulmonary artery catheterization**

- catheter insertion for, potential complication of (CO) [Cohen & Whalen], 714
- catheter insertion for, potential complication of (CO) [Cutarelli], 714

**regional**

- brachial plexus block
  - unintentional arterial catheterization and bupivacaine toxicity associated with (CR) [Tuominen, Pere & Rosenberg], 356

**spinal**

- continuous
  - distribution of catheter-injected local anesthetic in (LI) [Rigler & Drasner], 684
  - administration of opioids, histopathologic changes following (LI) [Rawal, Nuutinen, Raj, Lovering, Gobuty, Hagardine, Lehmkuhl, Herva & Abouleish], 1025
  - alter splanchnic organ responsiveness (LI) [Jordan & Miller], 654
  - failed, with Sprotte needle (CO) [Crone & Vogel], 717
  - in infants: could L5-S1 approach be safer? (CO) [Busoni & Meseri], 168
  - in infants: could L5-S1 approach be safer? (CO) [Orr & Haberkern], 169
  - and ketamine and midazolam neurotoxicity in rabbit (LI) [Malinovsky, Cozian, Lepage, Mussini, Pinaud & Souron], 91
  - observation of spinal canal and cisternae with flexible fiberoptic during (LR) [Shimoji, Fujioka, Onodera, Hokari, Fukuda, Fujiwara & Hatori], 341
  - and reactivation of oral herpes simplex (CO) [Pennant & Wallace], 167
  - sudden asystole after, treated with "pacing thump" (CO) [Gibbons & Ditto], 705
  - "failed," repeat injection after, potentially unsafe practice (CO) [Drasner & Rigler], 713

**tracheal intubation**

- and postintubation croup in children (CO) [Litman & Keon], 1122

**transmucosal**

- fentanyl
  - absorption and bioavailability of (CI) [Streisand, Varvel, Stanski, LeMaire, Ashburn, Hague, Tarver & Stanley], 223

**Anesthetics**

**gases**

- nitrous oxide
  - in comparative study of effects on contractility and oxygen supply and demand in isolated hearts (LI) [Stowe, Monroe, Marjic, Bosnjak & Kampine], 1062
  - contribution of, to isoflurane MAC in children (CI) [Murray, Mehta & Forbes], 186
  - dose-response for atropine in children anesthetized with (CI) [Palmisano, Setlock, Brown, Siker & Tripuraneni], 238
  - for outpatient laparoscopy (CI) [Hemelrijck, Smith & White], 197
  - propofol with and without, effect of, on postoperative vomiting after strabismus surgery (CI) [Watcha, Simeon, White & Stevens], 204

- in study of system model for closed-circuit inhalation anesthesia (LR) [Lerou, Dirksen, Beneken Kolmer & Booij], 345
- xenon
- minimal-flow system for anesthesia with (LR) [Luttrupp, Rydgren, Thomasson & Werner], 896
- intravenous**
- alfentanil
- human liver microsomal, influence of dexmedetomidine and clonidine on (LR) [Kharasch, Hill & Eddy], 520
- butorphanol
- and/or midazolam, effects of (CO) [Dershwitz, Rosow, DiBiase & Zaslavsky], 707
  - and/or midazolam, effects of (CO) [Kestin], 706
  - and/or midazolam, effects of (CO) [Sosis], 706
- diazepam
- forearm compartment syndrome after administration of (CR) [Bortolussi, Hunter & Handal], 159
  - and GABAergic transmission in rat brain (LI) [Peduto, Concas, Santoro, Biggio & Gessa], 1000
- fentanyl
- bioavailability (CI) [Streisand, Varvel, Stanski, LeMaire, Ashburn, Hague, Tarver & Stanley], 223
- ketamine
- neurotoxicity in rabbit (LI) [Malinovsky, Cozian, Lepage, Musini, Pinaud & Souron], 91
- methohexital
- in study of contractile responses of guinea pig trachea to oxybarbiturates and thiobarbiturates (LI) [Curry, Lenox, Spannake & Hirshman], 679
- midazolam
- and/or butorphanol, effects of (CO) [Dershwitz, Rosow, DiBiase & Zaslavsky], 707
  - and/or butorphanol, effects of (CO) [Kestin], 706
  - and/or butorphanol, effects of (CO) [Sosis], 706
- pentobarbital
- pharmacodynamics of, influence of cryogenic brain injury on (LI) [Archer, Priddy, Tang, Sabourin & Samanani], 634
  - in study of contractile responses of guinea pig trachea to oxybarbiturates and thiobarbiturates (LI) [Curry, Lenox, Spannake & Hirshman], 679
- propofol
- bolus induction plus continuous infusion in Duchenne muscular dystrophy (CO) [Ginsburg, Porterfield & Lippman], 376
  - contamination of, from opening glass ampules (LR) [Zacher, Zornow & Evans], 893
  - effect of, on postoperative vomiting after strabismus surgery (CI) [Watcha, Simeon, White & Stevens], 204
  - enhancement by, of epinephrine-induced arrhythmias (LI) [Kamibayashi, Hayashi, Sumikawa, Yamatodani, Kawabata & Yoshiya], 1035
  - and GABAergic transmission in rat brain (LI) [Peduto, Concas, Santoro, Biggio & Gessa], 1000
  - and halothane, norepinephrine kinetics with (LI) [Deegan, BingHe, Wood & Wood], 481
  - induction dose of, in infants and children (CO) [Borgeat, Wilder-Smith & Tassonyi], 550
  - induction dose of, in infants and children (CO) [Westrin], 550
  - modification of evoked hippocampal dentate inhibition (LI) [Albertson, Tseng & Joy], 82
  - for outpatient laparoscopy (CI) [Hemelrijck, Smith & White], 197
  - peripheral vascular effects of (CI) [Rouby, Andreev, Léger, Arthaud, Landault, Vicaut, Maistre, Eurin, Gandjbakch & Viars], 32
  - time course of ventilatory depression following induction with (CI) [Blouin, Conard & Gross], 940
- thiamylal**
- in study of contractile responses of guinea pig trachea to oxybarbiturates and thiobarbiturates (LI) [Curry, Lenox, Spannake & Hirshman], 679
- thiopental**
- in comparative study of anesthetic-epinephrine arrhythmia protocols (LI) [Woehick, Rusy & Altee], 884
  - peripheral vascular effects of (CI) [Rouby, Andreev, Léger, Arthaud, Landault, Vicaut, Maistre, Eurin, Gandjbakch & Viars], 32
  - time course of ventilatory depression following induction with (CI) [Blouin, Conard & Gross], 940
- local**
- benzocaine
- and methemoglobinemia (CO) [Mathews], 715
- bupivacaine
- and epinephrine, effects of, on sciatic nerve blood flow (LI) [Partridge], 243
  - fetal heart rate after (CI) [Loftus, Holbrook & Cohen], 406
  - optimum concentration of, for caudal-general anesthesia in children (CI) [Gunter, Dunn, Bennie, Pentecost, Bower & Ternberg], 57
  - toxicity to, associated with continuous interscalene brachial plexus block (CR) [Tuominen, Pere & Rosenberg], 356
- cocaine
- cardiovascular toxicity to, treatment of (CO) [Nahas], 544
- lidocaine
- catheter-injected, distribution of, in model of subarachnoid space (LI) [Rigler & Drasner], 684
  - cerebrospinal fluid distribution of (LI) [Marathe, Shen, Artru & Bowdle], 804
  - and drug access to site of action (EV) [Wood], 721
  - and epinephrine, effects of, on sciatic nerve blood flow (LI) [Partridge], 243
  - fetal heart rate after (CI) [Loftus, Holbrook & Cohen], 406
  - and ketamine and midazolam neurotoxicity in rabbit (LI) [Malinovsky, Cozian, Lepage, Mussini, Pinaud & Souron], 91
  - and spinal nerve root sleeve permeability (LI) [Bernards & Hill], 827
- n-butyl-p-aminobenzoate
- long-lasting epidural sensory blockade by, in intractable cancer pain (CI) [Korsten, Ackerman, Grouls, van Zundert, Bon, Bal, Crommelin, Ribot, Hoefsloot & Sloff], 950
- ropivacaine
- systemic toxicity of, during ovine pregnancy (LI) [Santos, Arthur, Pedersen, Morishima, Finster & Covino], 137
- tetracaine
- and epinephrine, effects of, on sciatic nerve blood flow (LI) [Partridge], 243
- toxicity to
- and peripheral nerve blood flow (LI) [Partridge], 243
  - of ropivacaine during ovine pregnancy (LI) [Santos, Arthur, Pedersen, Morishima, Finster & Covino], 137
  - in management of difficult adult airway (MI) [Benumof], 1087
  - potassium channel blockers potentiate impulse inhibition by (LI) [Drachman & Strichartz], 1051
- oral**
- ketamine
- palatable gelatin vehicle for (CO) [Rosen & Rosen], 914
- midazolam
- palatable gelatin vehicle for (CO) [Rosen & Rosen], 914
- potency of, See under Potency, anesthetic**

volatile

chloroform

first anesthetic mixture (CO) [Defalque & Wright], 1118

desflurane

in comparative study in patients undergoing coronary artery surgery (CI) [Thomson, Bowering, Hudson, Frai & Rosenbloom], 776

MAC of, and hemodynamic responses in neonates, infants, and children (CI) [Taylor & Lerman], 975

for outpatient laparoscopy (CI) [Hemelrijck, Smith & White], 197

enflurane

and abnormal cardiac electrophysiology (LI) [Laszlo, Polic, Kampine, Turner, Atlee & Bosnjak], 847

and automaticity in latent pacemaker fibers (LI) [Laszlo, Polic, Atlee, Kampine & Bosnjak], 98

in comparative study of effects on contractility and oxygen supply and demand in isolated hearts (LI) [Stowe, Monroe, Marjic, Bosnjak & Kampine], 1062

and respiratory reflexes from nose (CI) [Nishino, Tanaka, Ishikawa & Hiraga], 441

in study of system model for closed-circuit inhalation anesthesia (LR) [Lerou, Dirksen, Beneken Kolmer & Booi], 345

ether

first anesthetic mixture (CO) [Defalque & Wright], 1118

halothane

and abnormal cardiac electrophysiology (LI) [Laszlo, Polic, Kampine, Turner, Atlee & Bosnjak], 847

and atrial pacemaker automaticity (LI) [Polic, Atlee, Laszio, Kampine & Bosnjak], 298

and automaticity in latent pacemaker fibers (LI) [Laszlo, Polic, Atlee, Kampine & Bosnjak], 98

in comparative study of anesthetic-epinephrine arrhythmia protocols (LI) [Woehick, Rusy & Altee], 884

in comparative study of effects on contractility and oxygen supply and demand in isolated hearts (LI) [Stowe, Monroe, Marjic, Bosnjak & Kampine], 1062

coronary vasodilation by (LI) [Kenny, Proctor, Schmeling, Kampine & Warltier], 640

depresses D600 binding to bovine heart sarcolemma (LI) [Hoehner, Quigg & Blanck], 1019

in depression of baroreflexes in growing piglets (LI) [Palmisano, Clifford, Hoffmann, Seagard, Coon & Kampine], 512

dihydropyridine receptor modification of, and malignant hyperthermia (CI) [Adnet, Krivosic-Horber, Adamantidis, Reyford, Cordonnier & Haudecoeur], 415

direct vasodilation by, alters coronary flow reserve in isolated rat heart (LI) [Larach & Schuler], 268

dose-response for atropine in children anesthetized with (CI) [Palmisano, Setlock, Brown, Siker & Tripuraneni], 238

effects of, on patients with steal-prone coronary anatomy (CI) [Pulley, Kirvassilis, Kelermenos, Kater, Barzilai, Genton, Efsthathiou & Lappas], 756

effects of, on ventricular tachycardia in intact dogs (LI) [Gallagher & McClerman], 866

effects on  $Ca^{2+}$  in myocytes (LI) [Wilde, Knight, Sheth & Williams], 1075

electrophysiologic effects of, on canine Purkinje fibers (LI) [Gallagher], 106

and hepatic artery ligation in beagle (LI) [Fujita, Kimura, Hamada & Takaori], 313

inhibits residual fast sodium channels in human atrial muscle (CO) [Chou, Wei & Lin], 716

no worsening of ischemia with, during acute coronary artery occlusion (LI) [Moore, Kien, Reitan, White & Safwat], 854

ouabain, and atrial pacemaker automaticity (LI) [Polic, Atlee, Laszio, Kampine & Bosnjak], 305

propofol with and without, effect of, on postoperative vomiting after strabismus surgery (CI) [Watcha, Simeon, White & Stevens], 204

and propofol, norepinephrine kinetics with (LI) [Deegan, BingHe, Wood & Wood], 481

and respiratory reflexes from nose (CI) [Nishino, Tanaka, Ishikawa & Hiraga], 441

in study of dexmedetomidine prevention of epinephrine induction of arrhythmias (LI) [Hayashi, Sumikawa, Maze, Yamatodani, Kamibayashi, Kuro & Yoshiya], 113

and thermosensitive preoptic region neurons (LI) [Poterack, Kampine & Schmeling], 625

isoflurane

and abnormal cardiac electrophysiology (LI) [Laszlo, Polic, Kampine, Turner, Atlee & Bosnjak], 847

and automaticity in latent pacemaker fibers (LI) [Laszlo, Polic, Atlee, Kampine & Bosnjak], 98

and circadian temperature cycles in humans (CI) [Sessler, Lee & McGuire], 985

in comparative study in patients undergoing coronary artery surgery (CI) [Thomson, Bowering, Hudson, Frai & Rosenbloom], 776

in comparative study of effects on contractility and oxygen supply and demand in isolated hearts (LI) [Stowe, Monroe, Marjic, Bosnjak & Kampine], 1062

coronary vasodilation by (LI) [Kenny, Proctor, Schmeling, Kampine & Warltier], 640

and dexmedetomidine in spinal cord (LI) [Savola, Woodley, Maze & Kendig], 489

direct vasodilation by, alters coronary flow reserve in isolated rat heart (LI) [Larach & Schuler], 268

effects of, on patients with steal-prone coronary anatomy (CI) [Pulley, Kirvassilis, Kelermenos, Kater, Barzilai, Genton, Efsthathiou & Lappas], 756

and hepatic artery ligation in beagle (LI) [Fujita, Kimura, Hamada & Takaori], 313

hypothermia, and light reflex (CI) [Larson, Sessler, McGuire & Hynson], 62

MAC in children, contribution of nitrous oxide to (CI) [Murray, Mehta & Forbes], 186

no worsening of ischemia with, during acute coronary artery occlusion (LI) [Moore, Kien, Reitan, White & Safwat], 854

and respiratory reflexes from nose (CI) [Nishino, Tanaka, Ishikawa & Hiraga], 441

in study of coronary artery dilation and coronary steal (CO) [Buffington], 376

in study of coronary artery dilation and coronary steal (CO) [Warltier], 377

in study of physiologic responses to perianesthetic hypothermia (CI) [Sessler, Rubinstein & Moayeri], 594

in study of system model for closed-circuit inhalation anesthesia (LR) [Lerou, Dirksen, Beneken Kolmer & Booi], 345

sevoflurane

direct vasodilation by, alters coronary flow reserve in isolated rat heart (LI) [Larach & Schuler], 268

and hepatic artery ligation in beagle (LI) [Fujita, Kimura, Hamada & Takaori], 313

malignant hyperthermia during, in child with central core disease (CR) [Otsuka, Komura, Mayumi, Yamamura, Kemotsu & Mukaida], 699

- in study of system model for closed-circuit inhalation anesthesia (CI) [Lerou, Dirksen, Beneken Kolmer, Booij & Borm], 230
- in fatal anaphylaxis during anesthesia: radioimmunoassays to determine (CR) [Fisher, Baldo & Silbert], 1112
- Angiotensin converting enzyme inhibitors, *See under* Enzymes**
- Angiotensin II, *See under* Pharmacology**
- Animals**
- dog**
- anesthetics and abnormal cardiac electrophysiology in infarcted hearts of (LI) [Laszlo, Polic, Kampine, Turner, Atlee & Bosnjak], 847
- halothane and atrial pacemaker automaticity in (LI) [Polic, Atlee, Laszio, Kampine & Bosnjak], 298
- halothane, ouabain, and atrial pacemaker automaticity in (LI) [Polic, Atlee, Laszio, Kampine & Bosnjak], 305
- in study of effect of volatile anesthetics on Purkinje fiber automaticity (LI) [Laszlo, Polic, Atlee, Kampine & Bosnjak], 98
- swine**
- infant**
- depression of baroreflex control of heart rate by halothane in (LI) [Palmisano, Clifford, Hoffmann, Seagard, Coon & Kampine], 512
- Antagonists**
- benzodiazepine**
- flumazenil
- antagonism of midazolam-induced ventilatory depression (CI) [Gross, Weller & Conard], 179
- dizocilpine**
- and ischemic brain damage (LI) [Nellgård, Gustafson & Wieloch], 279
- glutamate**
- and ischemic brain damage (LI) [Nellgård, Gustafson & Wieloch], 279
- neuromuscular relaxants**
- anticholinesterases
- glycopyrrolate and (CO) [Grum], 1126
- glycopyrrolate and (CO) [Wingard], 1125
- edrophonium
- in reversal of neuromuscular blockade (CI) [Kopman], 588
- Antiarrhythmics, *See under* Sympathetic nervous system, sympatholytic agents**
- Anticholinergics, *See under* Parasympathetic nervous system**
- Anticholinesterases, *See under* Antagonists, neuromuscular relaxants**
- Anticoagulants, *See under* Blood**
- Anticoagulation, *See under* Blood**
- Antiemetics**
- droperidol**
- propofol with and without, effect of, on postoperative vomiting after strabismus surgery (CI) [Watcha, Simeon, White & Stevens], 204
- Antipsychotic medication, *See under* Pharmacology**
- Aorta, *See under* Arteries**
- Aortic dissection, *See under* Surgery, cardiac**
- Aortic surgery, *See under* Surgery**
- Apnea, *See under* Complications; Ventilation**
- Aprotinin, *See under* Blood, coagulation**
- Arachidonic acid, *See under* Metabolism**
- Arachnoid mater, *See under* Spinal cord**
- Arginine-rich basic polypeptides, *See under* Polypeptides**
- Arrhythmias, *See under* Heart**
- Arterial pressure**
- systolic, *See under* Arteries
- Arterial puncture, *See under* Complications**
- Arteries**
- aorta**
- abdominal, external compression of, for reversal of Tetralogy of Fallot cyanotic crisis (CR) [Baele, Rennotte & Veyckemans], 146
- coronary**
- dilation**
- isoflurane studied in steal-prone arteries (CO) [Buffington], 376
- isoflurane studied in steal-prone arteries (CO) [Wartier], 377
- steal**
- isoflurane studied in steal-prone arteries (CO) [Buffington], 376
- isoflurane studied in steal-prone arteries (CO) [Wartier], 377
- patients prone to, effects of isoflurane and halothane in (CI) [Pulley, Kirvassilis, Kelermenos, Kater, Barzilai, Genton, Efsthathiou & Lappas], 756
- systolic arterial pressure**
- in response to desflurane, in infants and children (CI) [Taylor & Lerman], 975
- Artificial heart, *See under* Heart**
- Aspiration, *See under* Complications**
- Asthma, *See under* Complications**
- Atipamezole, *See under* Sympathetic nervous system,  $\alpha_2$  antagonists; Sympathetic nervous system,  $\alpha_2$ -adrenergic agonists**
- Atracurium, *See under* Neuromuscular relaxants**
- Atrial rate, *See under* Heart**
- Atrial septal defect, *See under* Heart**
- Atrioventricular condition time, *See under* Heart**
- Atrium, *See under* Heart**
- Atropine, *See under* Parasympathetic nervous system**
- Automaticity, *See under* Heart**
- Autonomic blockade, *See under* Sympathetic nervous system**
- Autonomy, *See under* Complications**
- AV node, *See under* Heart**
- Awareness, *See under* Anesthesia, depth**

## B

- Bacterial contamination, *See under* Complications**
- Balanced anesthesia, *See under* Anesthetic techniques**
- Baroreceptor, *See under* Reflexes**
- BAY K8644, *See under* Ions, calcium, calcium agonist**
- Benzocaine, *See under* Anesthetics, local**
- Benzodiazepine antagonists, *See under* Antagonists**
- Benzodiazepines, *See under* Hypnotics; Receptors**
- Biology**
- circadian rhythm**
- temperature cycles in humans, isoflurane anesthesia and (CI) [Sessler, Lee & McGuire], 985
- diurnal variation**
- temperature cycles in humans, isoflurane anesthesia and (CI) [Sessler, Lee & McGuire], 985
- Blood**
- abdominal organ**
- spinal blockade alters responsiveness of (LI) [Jordan & Miller], 654
- anemia**
- effects on pulse oximetry and continuous mixed venous hemoglobin saturation monitoring (LI) [Lee, Tremper & Barker], 118
- anticoagulants**
- heparin
- and protamine complications, prevention of (LI) [Yang, Port, Kim, Teng, Till & Wakefield], 288

# anticoagulation

systematic, does it increase risk of internal jugular vein cannulation? (CO) [Peterson], 1124

# blood gases

and hypoxia among experts (CO) [Roy], 915

# coagulation

## aprotinin

and blood conservation techniques and platelet function in cardiac surgery (CI) [Boldt, Zickmann, Czeke, Herold, Dapper & Hempelmann], 426

mechanism of action of, and postoperative bleeding (CO) [Allison & Whitten], 377

mechanism of action of, and postoperative bleeding (CO) [Dietrich, Richter, Schramm & Spannagl], 378

mechanism of action of, and postoperative bleeding (CO) [Merle, Lançon, Dutrillaux, Obadia & Caillard], 379

## complement activation

and prevention of heparin/protamine complications (LI) [Yang, Port, Kim, Teng, Till & Wakefield], 288

## disorders

preoperative detection of, value of activated partial thromboplastin time for (CO) [Janvier, Winnock & Freyburger], 920

## heparin

inhaled nitric oxide prevents vasoconstriction by (LI) [Fratucci, Frostell, Chen, Wain, Robinson & Zapol], 990

## platelet activation

during cardiopulmonary bypass (CI) [Rinder, Bohnert, Rinder, Mitchell, Ault & Hillman], 388

## platelet aggregation

during cardiopulmonary bypass (CI) [Rinder, Bohnert, Rinder, Mitchell, Ault & Hillman], 388

## platelet glycoproteins

during cardiopulmonary bypass (CI) [Rinder, Bohnert, Rinder, Mitchell, Ault & Hillman], 388

## protamine

effects of, on vascular smooth muscle of rabbit mesenteric artery (LI) [Akata, Yoshitake, Nakashima & Itoh], 833

and heparin complications, prevention of (LI) [Yang, Port, Kim, Teng, Till & Wakefield], 288

inhaled nitric oxide prevents vasoconstriction by (LI) [Fratucci, Frostell, Chen, Wain, Robinson & Zapol], 990

right-to-left intracardiac shunting induced by (CR) [Cheung, Weiss & Savino], 904

during cardiopulmonary bypass (CI) [Rinder, Mathew, Rinder, Bonan, Ault & Smith], 563

## factor XII deficiency

cardiopulmonary bypass in patient with (CR) [Salmenperä, Rasi & Mattila], 539

## flow

### cerebral

in response to carbon dioxide during hypothermic bypass (LI) [Hindman, Funatsu, Harrington, Cutkomp, Dexter, Todd & Tinker], 662

## hemofiltration

and blood conservation techniques in cardiac surgery (CI) [Boldt, Zickmann, Czeke, Herold, Dapper & Hempelmann], 426

## hemoglobin

### saturation

monitoring of, and pulse oximetry, effects of anemia on (LI) [Lee, Tremper & Barker], 118

## loss

and blood conservation techniques in cardiac surgery (CI) [Boldt, Zickmann, Czeke, Herold, Dapper & Hempelmann], 426

## neutropenia

and anesthetic considerations in patients receiving colony-stimulating factors (CR) [Tobias & Furman], 536

## plasma

### glucose

effects of insulin infusion on, in hyperglycemic diabetic rats (LI) [Hofer & Lanier], 673

## platelet activation

during cardiopulmonary bypass (CI) [Rinder, Mathew, Rinder, Bonan, Ault & Smith], 563

## platelet aggregation

and blood conservation techniques in cardiac surgery (CI) [Boldt, Zickmann, Czeke, Herold, Dapper & Hempelmann], 426

## platelet function

and blood conservation techniques in cardiac surgery (CI) [Boldt, Zickmann, Czeke, Herold, Dapper & Hempelmann], 426

## platelet glycoproteins

during cardiopulmonary bypass (CI) [Rinder, Mathew, Rinder, Bonan, Ault & Smith], 563

## Blood flow, *See under* Blood; specific organs

## adrenal medulla

spinal blockade alters responsiveness of (LI) [Jordan & Miller], 654

## cerebral, *See under* Brain

## cutaneous

hyperventilation reduces (CI) [Barker, Hyatt, Clarke & Tremper], 619

## hepatic, *See under* Liver

## peripheral nerve, *See under* Circulation

## Blood gases, *See under* Blood

## Blood pressure

### hypotension

hemorrhagic, spinal blockade alters splanchnic organ responsiveness to (LI) [Jordan & Miller], 654

### measurement

#### right and left difference

in vascular surgery patients (CI) [Frank, Norris, Christopherson & Beattie], 457

#### tonometry

during anesthesia (LR) [Kemmons, Ueda, Otsuka, Yamamura, Winter & Eckerle], 333

## Blood pressure, *See under* Circulation; Measurement techniques; Monitoring

## Blood pressure monitors, *See under* Equipment; Monitoring

## Blood vessels

### vasoconstriction

in response to mild perianesthetic hypothermia in humans (CI) [Sessler, Rubinstein & Moayeri], 594

### vasodilation

effects of halothane and isoflurane on (LI) [Kenny, Proctor, Schmeling, Kampine & Warltier], 640

## Book reviews

Books received but not reviewed, November 1990 to June 1991, 719

Datta, S., *Anesthetic and Obstetric Management of High-risk Pregnancy* [Lindeman], 924

DeBruijn, N. P., and Clements, F. M. (eds.), *Intraoperative Use of Echocardiography* [Casella], 925

Miller, R. D. (ed.), *Anesthesia*, Third edition [Shanewise & Ramsay], 924

Motoyama, E. K., and Davis, P. J. (eds.), *Smith's Anesthesia for Infants and Children*, 5<sup>th</sup> edition [Yaster], 1129

Overton, C. E., *Studies of Narcosis* [Kepner], 552

Parbrook, G. D., Davis, P. D., and Parbrook, E. O., *Basic Physics and Measurement in Anesthesia*, 3<sup>rd</sup> edition [Mehr], 1128



- Riegelman, R. K., and Hirsch, R. P., *Studying a Study and Testing a Test: How to Read the Medical Literature*, 2<sup>nd</sup> edition [Gross], 1128
- Warfield, C. A., *Manual of Pain Management* [Curry], 926
- Brachial plexus block**, *See under Anesthetic techniques, regional*
- Brain**
- blood flow**
    - epinephrine dosage effects on, in model of cardiopulmonary resuscitation (LI) [Berkowitz, Gervais, Schleien, Koehler, Dean & Traystman], 1041
    - metabolism, and temperature, relationship among, during hypothermia (LI) [Michenfelder & Milde], 130
    - in response to carbon dioxide during hypothermic bypass (LI) [Hindman, Funatsu, Harrington, Cutkomp, Dexter, Todd & Tinker], 662
    - following resuscitation from hemorrhagic shock with hypertonic saline (LI) [Prough, Whitley, Taylor, Deal & DeWitt], 319
  - carbon dioxide response**
    - during hypothermic cardiopulmonary bypass in rabbits (LI) [Hindman, Funatsu, Harrington, Cutkomp, Dexter, Todd & Tinker], 662
  - cerebrospinal fluid**
    - lidocaine distribution in (LI) [Marathe, Shen, Artru & Bowdle], 804
  - electroencephalography**
    - in assessment of effect of halothane on preoptic region of anterior hypothalamus (LI) [Poterack, Kampine & Schmeling], 625
    - during carotid endarterectomy (CI) [Lam, Manninen, Ferguson & Nantau], 15
    - in measurement of cerebral metabolism during hypothermia (LI) [Michenfelder & Milde], 130
  - evoked potentials**
    - monitoring of
      - during carotid endarterectomy (CI) [Lam, Manninen, Ferguson & Nantau], 15
      - in propofol modification of hippocampal inhibition (LI) [Albertson, Tseng & Joy], 82
  - GABA-mediated inhibition**
    - in propofol modification of hippocampal inhibition (LI) [Albertson, Tseng & Joy], 82
  - hippocampus**
    - inhibition of, propofol and (LI) [Albertson, Tseng & Joy], 82
    - and lack of protection of brain by dizocilpine (LI) [Nellgård, Gustafson & Wieloch], 279
  - hypothalamus**
    - anterior, effect of halothane on thermosensitive neurons on (LI) [Poterack, Kampine & Schmeling], 625
  - injury**
    - cryogenic, influence of, on pharmacodynamics of pentobarbital (LI) [Archer, Priddy, Tang, Sabourin & Samanani], 634
  - intracranial pressure**
    - paraben preservatives do not increase, in cats (LI) [Pompy, Karlin, Capuano, Cottrell & Hartung], 669
    - following resuscitation from hemorrhagic shock with hypertonic saline (LI) [Prough, Whitley, Taylor, Deal & DeWitt], 319
  - ischemia**
    - cell death
      - and lack of protection of brain by dizocilpine (LI) [Nellgård, Gustafson & Wieloch], 279
    - protection
      - and lack of protection of brain by dizocilpine (LI) [Nellgård, Gustafson & Wieloch], 279
      - dexmedetomidine improves neurologic outcome from (LI) [Hoffman, Kochs, Werner, Thomas & Albrecht], 328
      - effects of insulin infusion on, in hyperglycemic diabetic rats (LI) [Hofer & Lanier], 673
  - metabolism**
    - blood flow, and temperature, relationship among, during hypothermia (LI) [Michenfelder & Milde], 130
  - neurons**
    - dopaminergic
      - electrical activity of, propofol and (LI) [Peduto, Concas, Santoro, Biggio & Gessa], 1000
    - nondopaminergic
      - electrical activity of, propofol and (LI) [Peduto, Concas, Santoro, Biggio & Gessa], 1000
  - neurotransmitters**
    - serotonin
      - in study of effects of brain injury on anesthetic requirements (LI) [Archer, Priddy, Tang, Sabourin & Samanani], 634
  - oxygen consumption**
    - epinephrine dosage effects on, in model of cardiopulmonary resuscitation (LI) [Berkowitz, Gervais, Schleien, Koehler, Dean & Traystman], 1041
  - perforant pathway**
    - in propofol modification of hippocampal inhibition (LI) [Albertson, Tseng & Joy], 82
  - subdural mass**
    - cerebral blood flow following resuscitation from hemorrhagic shock with hypertonic saline in (LI) [Prough, Whitley, Taylor, Deal & DeWitt], 319
  - temperature**
    - blood flow, and metabolism, relationship among, during hypothermia (LI) [Michenfelder & Milde], 130
- Breathing**, *See under Ventilation*
- Breathing circuits**, *See under Equipment*
- Breathing pattern**, *See under Ventilation*
- Bronchial cuff**, *See under Equipment*
- Bronchial rings**, *See under Airway*
- Bronchial segments**, *See under Airway*
- Bronchoscope, fiberoptic**, *See under Equipment*
- Bronchoscopy**, *See under Anesthetic techniques*
- Bronchospasm**, *See under Complications*
- Bupivacaine**, *See under Anesthetics, local*
- Burns**, *See under Complications*
- Butorphanol**, *See under Analgesics, opioid; Anesthetics, intravenous*

## C

- Ca<sup>2+</sup> homeostasis**, *See under Heart; Ions, calcium*
- Caffeine halothane contracture test**, *See under Measurement techniques*
- Calcitriol**, *See under Vitamins*
- Calcium**, *See under Ions*
- Calcium agonists**, *See under Ions, calcium*
- Calcium antagonists**, *See under Pharmacology*
- Calcium blockers**, *See under Ions*
- Calcium channel-blocking drugs**, *See under Ions, calcium; Pharmacology*
- Cancer pain**, *See under Pain*
- Captopril**, *See under Enzymes, inhibition*
- Carbon dioxide**
- end-tidal carbon dioxide tension**
    - pulse oximetry and, in congenital heart disease (CI) [Fletcher], 210
  - hypercapnia**
    - effects of, on electroencephalogram and somatosensory evoked potentials (CI) [Kalkman, Boezeman, Ribberink, Oosting, Deen & Bovill], 68

- hypercarbia  
and ventilation after propofol and thiopental (CI) [Blouin, Conard & Gross], 940
- hypocapnia  
effects of, on electroencephalogram and somatosensory evoked potentials (CI) [Kalkman, Boezeman, Ribberink, Oosting, Deen & Bovill], 68  
hyperventilation reduces transcutaneous oxygen tension (CI) [Barker, Hyatt, Clarke & Tremper], 619
- ventilatory response  
flumazenil reversal of midazolam (CI) [Gross, Weller & Conard], 179  
after propofol and thiopental (CI) [Blouin, Conard & Gross], 940
- Cardiac anesthesia, *See under Anesthesia*
- Cardiac arrest, *See under Heart*
- Cardiac automaticity, *See under Heart*
- Cardiac electrophysiology, *See under Heart*
- Cardiac glycosides, *See under Heart*
- Cardiac ischemia, *See under Heart*
- Cardiac oxygen delivery, *See under Heart*
- Cardiac oxygen extraction, *See under Heart*
- Cardiac surgery, *See under Surgery*
- Cardiopulmonary bypass, *See under Surgery*, cardiac
- Cardiopulmonary resuscitation, *See under Heart*
- Cardiovascular anesthesia, *See under Anesthesia*
- Cardiovascular development, *See under Heart*
- Cardiovascular toxicity, *See under Toxicity*, cardiac
- Cardioverter-defibrillator, *See under Heart*
- Carotid endarterectomy, *See under Surgery*
- Catecholamines, *See under Sympathetic nervous system*
- Catheters, *See under Equipment*
- Cauda equina syndrome, *See under Complications*
- Caudal epidural anesthesia, *See under Anesthetic techniques*
- Celiac plexus block, *See under Anesthetic techniques*
- Cell saver, *See under Transfusion*
- Cell separator, *See under Equipment*
- Central anticholinergic syndrome, *See under Complications*
- Central cord syndrome, *See under Complications*
- Cerebral blood flow, *See under Brain*
- Cerebral carbon dioxide response, *See under Brain*
- Cerebral ischemia, *See under Brain*
- Cerebral metabolism, *See under Brain*
- Cerebral temperature, *See under Brain*
- Cerebrospinal fluid, *See under Brain*
- Cesium, *See under Pharmacology*
- Chest rigidity, *See under Complications*
- Chloroform, *See under Anesthetics*, volatile
- Chromatography  
high-pressure liquid, *See under Measurement techniques*
- Cirazoline, *See under Sympathetic nervous system*,  $\alpha_1$  adrenergic agonists
- Circadian rhythm, *See under Biology*
- Circulation  
blood pressure  
in response to atropine, oral clonidine influences (CI) [Nishikawa & Dohi], 217  
extracorporeal, *See under Surgery*, cardiovascular  
heart rate  
in response to atropine, oral clonidine influences (CI) [Nishikawa & Dohi], 217  
peripheral nerve blood flow  
effects of local anesthetics and epinephrine on (LI) [Partridge], 243  
pulmonary  
and endogenous nitrovasodilator and new cellular messenger (EV) [Johns], 927  
in protamine-induced right-to-left intracardiac shunting (CR) [Cheung, Weiss & Savino], 904  
and pulmonary vasoregulation posthypoperfusion (LI) [Fehr, Nyhan, Chen & Murray], 257  
in response to desflurane, in infants and children (CI) [Taylor & Lerman], 975  
and thromboxane-induced pulmonary edema (LI) [Wakerlin, Benson & Pearl], 475
- Clonidine, *See under Pharmacology*; Sympathetic nervous system; Sympathetic nervous system,  $\alpha_2$  agonists; Sympathetic nervous system,  $\alpha_2$ -adrenergic agonist; Sympathetic nervous system,  $\alpha_2$ -adrenergic agonists
- Clonus, *See under Reflexes*
- Closed-circuit anesthesia, *See under Anesthetic techniques*
- Coagulation, *See under Blood*
- Cocaine, *See under Anesthetics*, local
- Colony-stimulating factors, *See under Immunology*
- Coma, *See under Complications*
- Combitube, *See under Equipment*
- Compartment syndrome, *See under Complications*
- Complement activation, *See under Blood*, coagulation
- Complete heart block, *See under Heart*
- Compliance, *See under Lung(s)*
- Complications  
abscess  
epidural  
associated with epidural catheterization (CO) [Strong], 709  
associated with epidural catheterization (CO) [Waldman], 708
- air entrainment  
during cardiopulmonary bypass surgery (CO) [Brobst-Lane], 1120  
during cardiopulmonary bypass surgery (CO) [Quinn], 1120
- airway  
in Larsen's syndrome (CR) [Stevenson, Hall & Palmieri], 142
- airway obstruction  
another cause of (CO) [Hatanaka & Yamashita], 1117  
after three sufentanil-pancuronium induction sequences (CI) [Horrow, Abrams, Van Riper, Lambson & Storella], 969
- anemia  
in pediatric day-surgery patients (CI) [Hackmann, Steward & Sheps], 27
- apnea  
in former premature infants (CI) [Kurth & LeBard], 22  
postoperative, in full-term infant (CO) [Karayan, LaCoste & Fucsiardi], 375
- arterial injection  
and bupivacaine toxicity associated with continuous interscalene brachial plexus block (CR) [Tuominen, Pere & Rosenberg], 356
- arterial puncture  
of internal jugular vein using continuously transduced pressure (CO) [Mangar & Connell], 383
- aspiration  
tracheal  
of surgically produced foreign bodies (CO) [Hitt & Doblar], 915  
infrequently leading to malpractice suits (CI) [Cheney, Posner & Caplan], 932  
in management of difficult adult airway (MI) [Benumof], 1087
- asthma  
guinea pigs, in response to oxybarbiturates and thiobarbiturates (LI) [Curry, Lenox, Spannake & Hirshman], 679
- autonomy  
injury prior to neurectomy alters pattern of, in rats (LI) [Katz, Vaccarino, Coderrec & Melzack], 876

- bacterial contamination**  
of drug from opening glass ampules (LR) [Zacher, Zornow & Evans], 893
- bronchospasm**  
infrequently leading to malpractice suits (CI) [Cheney, Posner & Caplan], 932
- burns**  
associated with pulse oximetry during magnetic resonance imaging (CO) [Bashein & Syrovy], 382
- cauda equina syndrome**  
repeat injection after "failed spinal": potentially unsafe practice (CO) [Drasner & Rigler], 713
- central anticholinergic syndrome**  
glycopyrrolate and (CO) [Grum], 1126  
glycopyrrolate and (CO) [Wingard], 1125
- central cord syndrome**  
after thoracolumbar surgery in prone position (CR) [Deem, Shapiro & Marshall], 527
- central core disease**  
malignant hyperthermia during sevoflurane anesthesia in child with (CR) [Otsuka, Komura, Mayumi, Yamamura, Kemmotsu & Mukaida], 699
- chest rigidity**  
after three sufentanil-pancuronium induction sequences (CI) [Horrow, Abrams, Van Riper, Lambson & Storella], 969
- coma**  
and bupivacaine toxicity associated with continuous interscalene brachial plexus block (CR) [Tuominen, Pere & Rosenberg], 356
- compartment syndrome**  
diagnosis of, epidural opioid analgesia does not obscure, resulting from prolonged lithotomy position (CR) [Montgomery & Ready], 541
- croup**  
postintubation, in children (CO) [Litman & Keon], 1122
- cyanosis**  
Tetralogy of Fallot  
external compression of abdominal aorta reversing (CR) [Baele, Rennotte & Veyckemans], 146
- diabetes**  
little risk of hyperosmolar coma in, during cardiopulmonary bypass (CO) [Alberti], 913  
little risk of hyperosmolar coma in, during cardiopulmonary bypass (CO) [Hirsch & White], 912  
little risk of hyperosmolar coma in, during cardiopulmonary bypass (CO) [Metz], 912
- dystonia**  
and spastic torticollis during general anesthesia (CR) [Stemp & Taswell], 365
- embolism**  
in protamine-induced right-to-left intracardiac shunting (CR) [Cheung, Weiss & Savino], 904
- failed spinal anesthesia**  
with Sprotte needle (CO) [Crone & Vogel], 717
- forearm compartment syndrome**  
after diazepam administration (CR) [Bortolussi, Hunter & Handal], 159
- foreign bodies**  
surgically produced  
risk of tracheal aspiration of (CO) [Hitt & Doblar], 915
- Guillain-Barré syndrome**  
burning pain of, opioid analgesics and (CO) [Ennis], 913  
burning pain of, opioid analgesics and (CO) [Warfield], 914
- headache**  
post-dural puncture  
unusual cause of (CR) [Parlow & Einarson], 145
- herpes simplex**  
intrathecal morphine as cause for, should be scratched out (CO) [Abouleish], 919  
intrathecal morphine as cause for, should be scratched out (CO) [Pennant & Wallace], 920
- herpes simplex labialis**  
reactivation of, intrathecal morphine and (CO) [Pennant & Wallace], 167
- high spinal**  
in infants undergoing spinal anesthesia: could L5-S1 approach be safer? (CO) [Busoni & Messeri], 168  
in infants undergoing spinal anesthesia: could L5-S1 approach be safer? (CO) [Orr & Haberkern], 169
- hypertension**  
pulmonary  
and endogenous nitrovasodilator and new cellular messenger (EV) [Johns], 927  
in gravid ewes in response to vasopressors, does magnesium sulfate alter? (LI) [Sipes, Chestnut, Vincent, Weiner, Thompson & Chatterjee], 1010
- hypotension**  
postoperative, in pain treatment, intravenous clonidine and (CI) [Bernard, Hommeril, Passuti & Pinaud], 577  
with protamine administration after cardiopulmonary bypass (LI) [Akata, Yoshitake, Nakashima & Itoh], 833
- hypoxia**  
in former premature infants (CI) [Kurth & LeBard], 22
- Larsen's syndrome**  
anesthetic considerations for patients with (CR) [Stevenson, Hall & Palmieri], 142
- malignant hyperthermia**  
during sevoflurane anesthesia in child with central core disease (CR) [Otsuka, Komura, Mayumi, Yamamura, Kemmotsu & Mukaida], 699
- methemoglobinemia**  
benzocaine and (CO) [Mathews], 715
- misidentification**  
and altered load dependence of postischemic myocardium (LI) [Buffington & Coyle], 464
- nerve palsy**  
and automatic blood pressure measurement (CO) [Schaer], 381
- neurologic**  
cauda equina syndrome  
after continuous spinal anesthesia (LI) [Rigler & Drasner], 684
- neurotoxicity**  
following intrathecal administration of opioids (LI) [Rawal, Nuutinen, Raj, Lovering, Gobuty, Hagardine, Lehmkuhl, Herva & Abouleish], 1025
- pediatric**  
in Larsen's syndrome (CR) [Stevenson, Hall & Palmieri], 142
- pneumothorax**  
infrequently leading to malpractice suits (CI) [Cheney, Posner & Caplan], 932
- postoperative morbidity**  
high-risk procedures, general *versus* "balanced" general anesthesia for (CI) [Baron, Bertrand, Barré, Godet, Mundler, Coriat & Viars], 611
- pulmonary**  
postsurgical, following combined epidural and general anesthesia or general anesthesia (CI) [Baron, Bertrand, Barré, Godet, Mundler, Coriat & Viars], 611
- pulmonary contusion**  
shock-wave-induced, life-threatening hypoxemia after lithotripsy in adult due to (CR) [Malhotra, Rosen & Slepian], 529

quadraparesis  
in patient with cervical spondylosis after thoracolumbar surgery  
in prone position (CR) [Deem, Shapiro & Marshall], 527  
regional wall motion abnormality  
and altered load dependence of postischemic myocardium (LI)  
[Buffington & Coyle], 464  
respiratory  
adverse, infrequently leading to malpractice suits (CI) [Cheney,  
Posner & Caplan], 932  
respiratory depression  
and epidural nalbuphine or morphine after thoracotomy (CI)  
[Etches, Sandler & Lawson], 9  
following intrathecal opioids (CO) [Levy], 712  
sinus bradycardia  
and clonidine and intravenous atropine (CI) [Nishikawa & Dohi],  
217  
spasms  
pharyngeal  
intractable, following tracheal extubation in undiagnosed teta-  
nus (CR) [Baronia, Singh & Dhiman], 1111  
sudden asystole  
after spinal anesthesia treated with "pacing thump" (CO) [Gib-  
bons & Ditto], 705  
surgery  
high-risk procedures, general *versus* "balanced" general anes-  
thesia for (CI) [Baron, Bertrand, Barré, Godet, Mundler, Coriat  
& Viars], 611  
Tetralogy of Fallot  
cyanotic crisis  
external compression of abdominal aorta reversing (CR)  
[Baele, Rennotte & Veyckemans], 146  
torticollis  
spastic, during general anesthesia (CR) [Stemp & Taswell], 365  
tracheal extubation  
transparent dressing is useful for secure fixation of endotracheal  
tube (CO) [Mikawa, Maekawa, Goto, Yaku & Obara], 1123  
vomiting  
effect of propofol on, after strabismus surgery (CI) [Watcha, Si-  
meon, White & Stevens], 204  
associated with similar machine controls (CO) [Maurer], 167  
difficult to remove catheters, spinal or epidural, approach to  
(CO) [Gravenstein, Blackshear & Wissler], 544  
post-dural puncture, new presentation of (CO) [Kelly, Boyd &  
Plagenhoff], 548  
of pulmonary artery catheter insertion (CO) [Cohen & Whalen],  
714  
of pulmonary artery catheter insertion (CO) [Cutarelli], 714  
Computers, *See under* Equipment  
Congestive heart failure, *See under* Heart  
Continuous infusion, *See under* Anesthetic techniques  
Contractility, *See under* Muscle  
Controlled ventilation, *See under* Ventilation  
Coronary artery, *See under* Arteries  
Coronary artery bypass graft, *See under* Surgery, cardiac  
Coronary artery disease, *See under* Heart  
Coronary artery steal, *See under* Arteries, coronary  
Coronary blood flow, *See under* Heart  
Coronary circulation, *See under* Heart  
Coronary dilation, *See under* Arteries, coronary  
Coronary flow, *See under* Heart  
Coronary hemodynamics, *See under* Heart  
Coronary reserve, *See under* Heart  
Coronary resistance vessels, *See under* Heart  
Coronary spasm, *See under* Heart  
Coronary steal, *See under* Arteries, coronary  
Coronary vasodilation, *See under* Heart

Cortisol, *See under* Hormones, adrenal  
Cricothyroidotomy, *See under* Surgery, laryngeal  
Critical care, *See under* Intensive care  
Croup, *See under* Complications  
Cyanosis, *See under* Complications  
Cyanotic congenital disease, *See under* Heart  
Cyclooxygenase, *See under* Enzymes  
Cyclosporines, *See under* Pharmacology

## D

D600, *See under* Pharmacology, calcium channel-blocking drugs  
Dantrolene, *See under* Neuromuscular relaxants  
Data processing, automatic, *See under* Records, anesthesia  
Deafferentation, *See under* Nerve(s)  
Deep tendon reflexes, *See under* Reflexes  
Defibrillation, *See under* Heart  
Deglutition, *See under* reflexes  
Depth of anesthesia, *See under* Anesthesia  
Desflurane, *See under* Anesthetics volatile; Anesthetics, volatile  
Dexmedetomidine, *See under* Pharmacology; Sympathetic nervous  
system,  $\alpha_2$ -adrenergic agonists; Sympathetic nervous sys-  
tem,  $\alpha$ -adrenergic receptor agonists  
Diabetes, *See under* Complications; Metabolism  
Diaphragm, *See under* Muscle; Muscle, skeletal  
Diazepam, *See under* Anesthetics, intravenous  
Diurnal variation, *See under* Biology  
Dizocilpine, *See under* Antagonists  
D-Medetomidine, *See under* Premedication; Sympathetic nervous  
system  
Dog, *See under* Animals  
"Do-not-resuscitate" orders, *See under* Ethics  
Dopamine, *See under* Sympathetic nervous system  
Dopamine receptors, *See under* Sympathetic nervous system  
Dopaminergic neurons, *See under* Brain  
Doppler, *See under* Measurement techniques  
Doppler ultrasonography, *See under* Measurement techniques  
Doxazosin, *See under* Sympathetic nervous system,  $\alpha_1$  adrenergic  
antagonists  
Droperidol, *See under* Antiemetics  
Drug interactions, *See under* Interactions (drug)  
Dura mater, *See under* Spinal cord  
Dysrhythmias, *See under* Heart  
Dystonia, *See under* Complications

## E

Ear  
tympanic membrane  
temperature  
measurement of, in evaluation of physiologic responses to mild  
perianesthetic hypothermia in humans (CI) [Sessler, Rubin-  
stein & Moayeri], 594  
Echocardiography, *See under* Measurement techniques; Monitoring  
Edrophonium, *See under* Antagonists, neuromuscular relaxants  
Electrical field stimulation, *See under* Electrical systems  
Electrical systems  
electrical field stimulation  
in study of bronchodilation and airway epithelium (LI) [Sayiner,  
Lorenz, Warner & Rehder], 75  
Electrocardiography, *See under* Monitoring  
Electrocautery, *See under* Equipment  
Electroencephalography, *See under* Brain; Monitoring  
Electromyography, *See under* Measurement techniques  
Electrophysiology, *See under* Heart

**Embolism, *See under* Complications****air**

during cardiopulmonary bypass surgery (CO) [Brobst-Lane], 1120

during cardiopulmonary bypass surgery (CO) [Quinn], 1120  
in intraoperative ventilator-induced right-to-left intracardiac shunt (CR) [Jaffe, Pinto, Schnittger & Brock-Utne], 153

**Endothelium-derived relaxing factor, *See under* Muscle, smooth; Pharmacology****Endotracheal tube, *See under* Equipment****End-tidal carbon dioxide tension, *See under* Carbon dioxide****End-tidal concentration, *See under* Monitoring****Enflurane, *See under* Anesthetics, volatile****Enzyme inhibitors, *See under* Enzymes****Enzymes****angiotensin converting enzyme inhibitors****captopril**

and pulmonary vasoregulation posthypoperfusion (LI) [Fehr, Nyhan, Chen & Murray], 257

**cyclooxygenase**

pulmonary vasoregulation by, posthypoperfusion (LI) [Fehr, Nyhan, Chen & Murray], 257

**inhibition****converting-enzyme inhibition**

and pulmonary vasoregulation posthypoperfusion (LI) [Fehr, Nyhan, Chen & Murray], 257

**Epidural anesthesia, *See under* Anesthetic techniques; Anesthetic techniques, epidural****Epidural blood patch, *See under* Anesthetic techniques****Epinephrine, *See under* Hormones; Sympathetic nervous system; Sympathetic nervous system, catecholamines****Epithelium-derived relaxing factor, *See under* Airway****Equipment****alarms**

standardized, more on (CO) [Zbinden & Hutmacher], 1125

**ampules**

glass, drug contamination from opening of (LR) [Zacher, Zornow & Evans], 893

**anesthesia machines**

FDA Anesthesia Apparatus Checkout Recommendations (checklist) and anesthesiologists' present checkout methods, evaluation of (CI) [March & Crowley], 724

**malfunctions**

and anesthesiologists' present checkout methods, evaluation of (CI) [March & Crowley], 724

**preuse checkout methods**

and anesthesiologists' present checkout methods, evaluation of (CI) [March & Crowley], 724

disadvantage of similar controls on (CO) [Maurer], 167

**blood pressure monitors****noninvasive**

peripheral nerve injury and (CO) [Schaer], 381

for continuous noninvasive finger blood pressure during controlled hypotension (CI) [Epstein, Bartkowski & Huffnagle], 796

**breathing circuits**

and anesthesiologists' assessment of changes in neonatal pulmonary compliance by "educated hand" (LR) [Spears, Yeh, Fisher & Zwass], 693

in pediatric anesthesia (EV) [Steward], 555

**bronchial cuff**

inflation, Univent® tube for (CO) [Hannallah], 165

**bronchoscope****fiberoptic**

in management of difficult adult airway (MI) [Benumof], 1087

**catheters****epidural**

or spinal, that are difficult to remove, approach to (CO) [Gravenstein, Blackshear & Wissler], 544

**spinal**

or epidural, that are difficult to remove, approach to (CO) [Gravenstein, Blackshear & Wissler], 544

transtracheal large-bone intravenous, spontaneous ventilation *via*, is possible (CR) [Dallen, Wine & Benumof], 531

**cell separator**

and platelet function in cardiac surgery (CI) [Boldt, Zickmann, Czeke, Herold, Dapper & Hempelmann], 426

**computers****models**

closed-circuit anesthesia and (LR) [Lerou, Dirksen, Beneken Kolmer & Booi], 345

**programming languages**

closed-circuit anesthesia and (LR) [Lerou, Dirksen, Beneken Kolmer & Booi], 345

**simulation**

closed-circuit anesthesia and (LR) [Lerou, Dirksen, Beneken Kolmer & Booi], 345

system model for closed-circuit inhalation anesthesia (CI) [Lerou, Dirksen, Beneken Kolmer, Booi & Borm], 230

automated interview *versus* personal interview (CI) [Lutner, Roizen, Stocking, Thisted, Kim, Duke, Pompei & Cassel], 394

**electrocautery**

permanent ventricular pacemaker and (CR) [Ducey, Fincher & Baysinger], 533

**fiberoptic bronchoscope tube changer**

additional safety measures when changing endotracheal tubes (CO) [Benumof], 921

**fiberscopes****flexible**

observation of spinal canal and cisternae with (LR) [Shimoji, Fujioka, Onodera, Hokari, Fukuda, Fujiwara & Hatori], 341

**Finapres®**

for continuous noninvasive finger blood pressure during controlled hypotension (CI) [Epstein, Bartkowski & Huffnagle], 796

**illuminating stylet**

in management of difficult adult airway (MI) [Benumof], 1087

**jet stylet**

in management of difficult adult airway (MI) [Benumof], 1087

**laryngeal mask**

for fiberoptic airway endoscopy in pediatric anesthesia (CO) [Maekawa, Mikawa, Tanaka, Goto & Obara], 169

**laryngoscopes**

in management of difficult adult airway (MI) [Benumof], 1087

**lasers**

in assessment of physiologic responses to mild perianesthetic hypothermia in humans (CI) [Sessler, Rubinstein & Moayeri], 594

**mask(s)****laryngeal**

should it be routinely used in patients undergoing thyroid surgery? (CO) [Charters, Cave-Bigley & Roysam], 918

should it be routinely used in patients undergoing thyroid surgery? (CO) [Tanigawa, Inoue & Iwata], 919

use of, in child with tracheal stenosis (CR) [Asai, Fujise & Uchida], 903

**monitors****blood pressure**

for continuous noninvasive finger blood pressure during con-

- trolled hypotension (CI) [Epstein, Bartkowski & Huffnagle], 796
- myeloscope**  
fiberoptic  
observation of spinal canal and cisternae with (LR) [Shimoji, Fujioka, Onodera, Hokari, Fukuda, Fujiwara & Hatori], 341
- nasopharyngeal airway**  
in management of difficult adult airway (MI) [Benumof], 1087
- needle(s)**  
proper size, for performing cervical epidural injections (CO) [Goffen], 166  
proper size, for performing cervical epidural injections (CO) [Jackson & Rauck], 166
- Sprotte**  
failed spinal anesthesia with (CO) [Crone & Vogel], 717
- oropharyngeal airway**  
in management of difficult adult airway (MI) [Benumof], 1087
- pacemaker**  
permanent ventricular, therapeutic suppression of, using peripheral nerve stimulator (CR) [Ducey, Fincher & Baysinger], 533
- Paryngeal mask airway**  
in management of difficult adult airway (MI) [Benumof], 1087
- tube(s)**  
endotracheal  
and pressure support work for breathing (CI) [Brochard, Rua, Lorino, LeMaire & Harf], 739  
transparent dressing for secure fixation of (CO) [Mikawa, Mac-kawa, Goto, Yaku & Obara], 1123
- Tuohy-Borst adapter**  
complication caused by, in pulmonary artery catheter insertion (CO) [Cohen & Whalen], 714  
complication caused by, in pulmonary artery catheter insertion (CO) [Cutarelli], 714
- Univent® tube**  
for single lung ventilation (CO) [Hannallah], 165  
aids for fiberoptically guided intubation in children (CO) [Wilton], 549
- Ether, See under Anesthetics, volatile**
- Ethics**  
do-not-resuscitate orders  
during anesthesia and surgery (CO) [Daly & Seravalli], 709  
during anesthesia and surgery (CO) [Truog], 710
- in publishing**  
and the "operator" (CO) [Knill], 545  
and the "operator" (CO) [Smith, Miller, Saidman & Morgan], 545  
truth in advertising: *The Journal's* responsibility (CO) [Atkins], 547  
truth in advertising: *The Journal's* responsibility (CO) [Zapol], 547
- Evoked potentials, See under Brain; Monitoring**  
monitoring of, *See under Monitoring*
- Extracorporeal shock wave lithotripsy, See under Kidney**
- Extubation, See under Airway**  
tracheal, *See under Airway; Complications*

## F

- Factor XII deficiency, See under Blood**
- Fentanyl, See under Analgesics; Analgesics, epidural; Analgesics, intravenous; Anesthetics, intravenous; Pharmacokinetics**
- Fetal heart rate, See under Monitoring**
- Fiberoptic bronchoscope, See under Equipment**  
tube changer, *See under Equipment*

- Fiberoptic bronchoscopy, See under Anesthetic techniques; Monitoring**
- Fiberoptic intubation, See under Anesthetic techniques**
- Fiberscopes, See under Equipment**
- Finapres®, See under Equipment**
- Flow cytometry, See under Measurement techniques**
- Flumazenil, See under Antagonists, benzodiazepine**
- Forearm compartment syndrome, See under Complications**
- Foreign bodies, See under Complications**

## G

- GABA, See under Receptors, benzodiazepines**
- GABA-B, See under Receptors**
- GABA-mediated inhibition, See under Brain**
- Gallopamil, See under Pharmacology, calcium channel-blocking drugs**
- Gastrointestinal tract**  
splanchnic nerve activity  
spinal blockade alters (LI) [Jordan & Miller], 654
- G-CSF, See under Immunology, colony-stimulating factors**
- General anesthesia, See under Anesthesia**
- Genetic factors**  
molecular biology  
application of, to anesthesiology (CO) [Lightstone], 1126
- Genetics**  
molecular  
in diagnosis of malignant hyperthermia, caffeine halothane muscle contracture test compared to (CI) [MacKenzie, Allen, Lahay, Crossan, Nolan, Mettler, Worton, MacLennan & Korneluk], 4  
and malignant hyperthermia (EV) [Levitt, Meyers, Fletcher & Rosenberg], 1
- Glucose, See under Metabolism**
- Glutamate, See under Antagonists; Receptors**
- Glycoproteins**  
platelet, *See under Blood, coagulation*
- Glycopyrrolate, See under Parasympathetic nervous system**
- GM-CSF, See under Immunology, colony-stimulating factors**
- Guillain-Barré syndrome, See under Complications**

## H

- Halothane, See under Anesthetics, volatile**
- Headache, See under Complications**
- Heart**  
abnormal automaticity  
effects of halothane, enflurane, and isoflurane on (LI) [Laszlo, Polic, Kampine, Turner, Atlee & Bosnjak], 847
- afterload**  
and altered load dependence of postischemic myocardium (LI) [Buffington & Coyle], 464
- arrhythmia(s)**  
electrophysiology  
dantrolene suppression of, in malignant hyperthermia (CI) [Kentsch, Roewer, Kunze & Kuck], 583  
and anesthetics and automaticity in latent pacemaker fibers (LI) [Laszlo, Polic, Atlee, Kampine & Bosnjak], 98  
effects of halothane, enflurane, and isoflurane on (LI) [Laszlo, Polic, Kampine, Turner, Atlee & Bosnjak], 847  
and effects of halothane on ventricular tachycardia in intact dogs (LI) [Gallagher & McClernan], 866  
electrophysiologic effects of amiodarone and halothane on (LI) [Gallagher], 106

- epinephrine-induced, enhancement by propofol (LI) [Kamibayashi, Hayashi, Sumikawa, Yamatodani, Kawabata & Yoshiya], 1035
- epinephrine-induced, mechanism of antiarrhythmic effect of dexmedetomidine on (CO) [Eisenach], 1116
- epinephrine-induced, mechanism of antiarrhythmic effect of dexmedetomidine on (CO) [Hayashi & Sumikawa], 1116
- and halothane and atrial pacemaker automaticity (LI) [Polic, Atlee, Laszio, Kampine & Bosnjak], 298
- and halothane, ouabain, and atrial pacemaker automaticity (LI) [Polic, Atlee, Laszio, Kampine & Bosnjak], 305
- protocols, anesthetic-epinephrine (LI) [Woehick, Rusy & Atlee], 884
- and successful defibrillation with near-simultaneous orthogonal discharges (CR) [Horrow & Pharo], 362
- artificial**
- peripheral vascular effects of thiopental and propofol in humans with (CI) [Rouby, Andreev, Léger, Arthaud, Landault, Vicaut, Maistre, Eurin, Gandjbakch & Viars], 32
- atrial rate**
- comparison of halothane, enflurane, and isoflurane with nitrous oxide on, in isolated hearts (LI) [Stowe, Monroe, Marijic, Bosnjak & Kampine], 1062
- atrial septal defect**
- protamine-induced right-to-left intracardiac shunting (CR) [Cheung, Weiss & Savino], 904
- atrioventricular conduction time**
- comparison of halothane, enflurane, and isoflurane with nitrous oxide on, in isolated hearts (LI) [Stowe, Monroe, Marijic, Bosnjak & Kampine], 1062
- atrium**
- halothane inhibits residual fast sodium channels in (CO) [Chou, Wei & Lin], 716
- automaticity**
- normal
- halothane and (LI) [Polic, Atlee, Laszio, Kampine & Bosnjak], 298
- halothane, ouabain and (LI) [Polic, Atlee, Laszio, Kampine & Bosnjak], 305
- Purkinje fiber
- volatile anesthetics and (LI) [Laszlo, Polic, Atlee, Kampine & Bosnjak], 98
- autoregulation**
- comparison of halothane, enflurane, and isoflurane with nitrous oxide on, in isolated hearts (LI) [Stowe, Monroe, Marijic, Bosnjak & Kampine], 1062
- blood flow**
- coronary
- with isoflurane or halothane during acute coronary artery occlusion (LI) [Moore, Kien, Reitan, White & Safwat], 854
- epinephrine dosage effects on, in model of cardiopulmonary resuscitation (LI) [Berkowitz, Gervais, Schleien, Koehler, Dean & Traystman], 1041
- blood pressure**
- and altered load dependence of postischemic myocardium (LI) [Buffington & Coyle], 464
- Ca<sup>2+</sup> homeostasis**
- halothane effects on, in myocytes (LI) [Wilde, Knight, Sheth & Williams], 1075
- cardiac arrest**
- after spinal anesthesia treated with "pacing thump" (CO) [Gibbons & Ditto], 705
- cardiac glycosides**
- halothane, ouabain and (LI) [Polic, Atlee, Laszio, Kampine & Bosnjak], 305
- cardiopulmonary resuscitation**
- and hypoxia among experts (CO) [Roy], 915
- swine model of, epinephrine dosage effects on (LI) [Berkowitz, Gervais, Schleien, Koehler, Dean & Traystman], 1041
- cardiovascular development**
- and halothane depression of baroreflexes in growing piglets (LI) [Palmisano, Clifford, Hoffmann, Seagard, Coon & Kampine], 512
- cardioverter-defibrillator**
- automatic implantable
- and successful defibrillation with near-simultaneous orthogonal discharges (CR) [Horrow & Pharo], 362
- complete heart block**
- during anesthesia: effect of scopolamine *versus* ischemia of AV node (CR) [Park & Lowenstein], 367
- congestive heart failure**
- peripartum, management of, in patient with myotonic dystrophy (CR) [Dodds, Haney & Appleton], 907
- postsurgical, following combined epidural and general anesthesia or general anesthesia (CI) [Baron, Bertrand, Barré, Godet, Mundler, Coriat & Viars], 611
- contractility**
- and altered load dependence of postischemic myocardium (LI) [Buffington & Coyle], 464
- coronary artery disease**
- steal-prone coronary anatomy in, isoflurane and halothane and (CI) [Pulley, Kirvassilis, Kelermenos, Kater, Barzilai, Genton, Efstathiou & Lappas], 756
- surgery in, desflurane and isoflurane compared for (CI) [Thomson, Bowering, Hudson, Fraiss & Rosenbloom], 776
- coronary blood flow**
- effects of halothane and isoflurane on (LI) [Kenny, Proctor, Schmeling, Kampine & Warltier], 640
- steal-prone coronary anatomy in, isoflurane and halothane and (CI) [Pulley, Kirvassilis, Kelermenos, Kater, Barzilai, Genton, Efstathiou & Lappas], 756
- coronary circulation**
- effects of halothane and isoflurane on (LI) [Kenny, Proctor, Schmeling, Kampine & Warltier], 640
- coronary flow**
- comparison of halothane, enflurane, and isoflurane with nitrous oxide on, in isolated hearts (LI) [Stowe, Monroe, Marijic, Bosnjak & Kampine], 1062
- coronary hemodynamics**
- effects of halothane and isoflurane on (LI) [Kenny, Proctor, Schmeling, Kampine & Warltier], 640
- coronary reserve**
- comparison of halothane, enflurane, and isoflurane with nitrous oxide on, in isolated hearts (LI) [Stowe, Monroe, Marijic, Bosnjak & Kampine], 1062
- coronary resistance vessels**
- direct vasodilation of, coronary flow reserve and (LI) [Larach & Schuler], 268
- coronary spasm**
- ST-segment elevation during (CR) [Whitten, Latson, Cochran, Elmore & Griffin], 161
- coronary vasodilation**
- effects of halothane and isoflurane on (LI) [Kenny, Proctor, Schmeling, Kampine & Warltier], 640

- cyanotic congenital disease**  
pulse oximetry and arterial end-tidal carbon dioxide differences in (CI) [Fletcher], 210
- defibrillation**  
with near-simultaneous orthogonal discharges (CR) [Horrow & Pharo], 362
- dysrhythmias**  
phenol motor point blocks in children and (CR) [Morrison, Matthews, Washington, Fennessey & Harrison], 359
- electrophysiology**  
and anesthetics and automaticity in latent pacemaker fibers (LI) [Laszlo, Polic, Atlee, Kampine & Bosnjak], 98  
effects of halothane, enflurane, and isoflurane on (LI) [Laszlo, Polic, Kampine, Turner, Atlee & Bosnjak], 847  
and effects of halothane on ventricular tachycardia in intact dogs (LI) [Gallagher & McClernan], 866  
and halothane and atrial pacemaker automaticity (LI) [Polic, Atlee, Laszlo, Kampine & Bosnjak], 298  
and halothane, ouabain, and atrial pacemaker automaticity (LI) [Polic, Atlee, Laszlo, Kampine & Bosnjak], 305
- heart rate**  
drug effects  
in infants and children anesthetized with halothane and nitrous oxide (CI) [Palmisano, Setlock, Brown, Siker & Tripuraneni], 238  
in response to desflurane, in infants and children (CI) [Taylor & Lerman], 975
- infarction**  
and effects of halothane on ventricular tachycardia in intact dogs (LI) [Gallagher & McClernan], 866
- inotropism**  
and pharmacokinetics of amrinone during cardiac surgery (CI) [Bailey, Levy, Rogers, Szlam & Hug], 961
- ischemia**  
pressure-rate quotient  
in patients undergoing coronary artery bypass graft surgery (CO) [Buffington], 710  
in patients undergoing coronary artery bypass graft surgery (CO) [Gordon, Urban, O'Connor & Barash], 711  
acute ventricular wall motion heterogeneity in (EV) [Lowenstein, Haering & Douglas], 385  
no worsening of, with isoflurane or halothane (LI) [Moore, Kien, Reitan, White & Safwat], 854
- isolated perfused**  
coronary hemodynamics  
volatile anesthetics and (LI) [Larach & Schuler], 268
- lactate production**  
myocardial, and ischemia during acute coronary artery occlusion (LI) [Moore, Kien, Reitan, White & Safwat], 854
- left ventricular pressure**  
comparison of halothane, enflurane, and isoflurane with nitrous oxide on, in isolated hearts (LI) [Stowe, Monroe, Marijic, Bosnjak & Kampine], 1062
- long QT syndrome**  
and effects of halothane on ventricular tachycardia in intact dogs (LI) [Gallagher & McClernan], 866
- myocardial function**  
and altered load dependence of postischemic myocardium (LI) [Buffington & Coyle], 464
- myocardial infarction**  
effects of halothane, enflurane, and isoflurane on automaticity and rhythmic activity of Purkinje fibers in (LI) [Laszlo, Polic, Kampine, Turner, Atlee & Bosnjak], 847  
postsurgical, following combined epidural and general anesthesia or general anesthesia (CI) [Baron, Bertrand, Barré, Godet, Mundler, Coriat & Viars], 611
- myocardial ischemia**  
effects of halothane, enflurane, and isoflurane on automaticity and rhythmic activity of Purkinje fibers in (LI) [Laszlo, Polic, Kampine, Turner, Atlee & Bosnjak], 847  
steal-prone coronary anatomy in, isoflurane and halothane and (CI) [Pulley, Kirvassilis, Kelermenos, Kater, Barzilai, Genton, Efstathiou & Lappas], 756
- myocardial metabolism**  
steal-prone coronary anatomy in, isoflurane and halothane and (CI) [Pulley, Kirvassilis, Kelermenos, Kater, Barzilai, Genton, Efstathiou & Lappas], 756
- myocardial oxygen consumption**  
comparison of halothane, enflurane, and isoflurane with nitrous oxide on, in isolated hearts (LI) [Stowe, Monroe, Marijic, Bosnjak & Kampine], 1062
- myocardial performance**  
and myocardial oxygen demand indices in patients awake and during anesthesia (CI) [Hoeft, Sonntag, Stephan & Kettler], 49
- myocardial perfusion**  
assessment of, during coronary artery bypass graft (CI) [Aronson, Lee, Wienczek, Feinstein, Roizen, Karp & Ellis], 433
- negative inotropy**  
and halothane effects on  $Ca^{2+}$  in myocytes (LI) [Wilde, Knight, Sheth & Williams], 1075
- nifedipine**  
in ST-segment elevation during cardiac electrophysiologic surgery (CR) [Whitten, Latson, Cochran, Elmore & Griffin], 161
- normal automaticity**  
effects of halothane, enflurane, and isoflurane on (LI) [Laszlo, Polic, Kampine, Turner, Atlee & Bosnjak], 847
- ouabain**  
halothane, and atrial pacemaker automaticity (LI) [Polic, Atlee, Laszlo, Kampine & Bosnjak], 305
- oxygen consumption**  
effects of halothane and isoflurane on (LI) [Kenny, Proctor, Schmeling, Kampine & Warltier], 640  
with isoflurane or halothane during acute coronary artery occlusion (LI) [Moore, Kien, Reitan, White & Safwat], 854  
and myocardial oxygen demand indices in patients awake and during anesthesia (CI) [Hoeft, Sonntag, Stephan & Kettler], 49
- oxygen delivery**  
comparison of halothane, enflurane, and isoflurane with nitrous oxide on, in isolated hearts (LI) [Stowe, Monroe, Marijic, Bosnjak & Kampine], 1062
- oxygen extraction**  
comparison of halothane, enflurane, and isoflurane with nitrous oxide on, in isolated hearts (LI) [Stowe, Monroe, Marijic, Bosnjak & Kampine], 1062
- pacemakers**  
permanent ventricular, therapeutic suppression of, using peripheral nerve stimulator (CR) [Ducey, Fincher & Baysinger], 533  
subsidiary atrial  
automaticity, halothane and (LI) [Polic, Atlee, Laszlo, Kampine & Bosnjak], 298  
automaticity, halothane, ouabain and (LI) [Polic, Atlee, Laszlo, Kampine & Bosnjak], 305



- papavarine**  
in ST-segment elevation during cardiac electrophysiologic surgery (CR) [Whitten, Latson, Cochran, Elmore & Griffin], 161
- patent foramen ovale**  
intraoperative ventilator-induced right-to-left intracardiac shunt in (CR) [Jaffe, Pinto, Schnittger & Brock-Utne], 153
- preload**  
and altered load dependence of postischemic myocardium (LI) [Buffington & Coyle], 464
- pressure work index**  
and myocardial oxygen demand indices in patients awake and during anesthesia (CI) [Hoeft, Sonntag, Stephan & Kettler], 49
- Purkinje fibers**  
automaticity  
volatile anesthetics and (LI) [Laszlo, Polic, Atlee, Kampine & Bosnjak], 98  
effects of halothane, enflurane, and isoflurane on (LI) [Laszlo, Polic, Kampine, Turner, Atlee & Bosnjak], 847  
electrophysiologic effects of amiodarone and halothane on (LI) [Gallagher], 106
- rate pressure product**  
and myocardial oxygen demand indices in patients awake and during anesthesia (CI) [Hoeft, Sonntag, Stephan & Kettler], 49
- reentry**  
and effects of halothane on ventricular tachycardia in intact dogs (LI) [Gallagher & McClernan], 866
- regional myocardial performance**  
and altered load dependence of postischemic myocardium (LI) [Buffington & Coyle], 464
- sarcoplasmic reticulum**  
and halothane effects on  $\text{Ca}^{2+}$  in myocytes (LI) [Wilde, Knight, Sheth & Williams], 1075
- sinus node**  
and halothane and atrial pacemaker automaticity (LI) [Polic, Atlee, Laszio, Kampine & Bosnjak], 298  
and halothane, ouabain, and atrial pacemaker automaticity (LI) [Polic, Atlee, Laszio, Kampine & Bosnjak], 305
- tension time index**  
and myocardial oxygen demand indices in patients awake and during anesthesia (CI) [Hoeft, Sonntag, Stephan & Kettler], 49
- triggered activity**  
effects of halothane, enflurane, and isoflurane on (LI) [Laszlo, Polic, Kampine, Turner, Atlee & Bosnjak], 847
- vascular pressures**  
inhaled nitric oxide prevents heparin-protamine vasoconstriction (LI) [Fratacci, Frostell, Chen, Wain, Robinson & Zapol], 990
- ventricular tachycardia**  
effects of halothane on, in intact dogs (LI) [Gallagher & McClernan], 866
- wall motion abnormality**  
acute heterogeneity (EV) [Lowenstein, Haering & Douglas], 385
- "pacing thump"**  
sudden asystole after spinal anesthesia treated with (CO) [Gibbons & Ditto], 705  
dexmedetomidine and (LI) [Hayashi, Sumikawa, Maze, Yamatodani, Kamibayashi, Kuro & Yoshiya], 113  
ischemia of, *versus* scopolamine, during anesthesia in coronary artery disease (CR) [Park & Lowenstein], 367
- Heart rate, See under Circulation; Heart**
- Hemofiltration, See under Blood**  
continuous arteriovenous, *See under Kidney*
- Hemoglobin, See under Blood**  
oxygen saturation  
in congenital heart disease (CI) [Fletcher], 210
- Hemorrhagic shock, See under Shock**
- Heparin, See under Blood, anticoagulants**
- Hepatic blood flow, See under Liver**
- Herpes simplex, See under Complications**
- Herpes simplex labialis, See under Complications**
- High-pressure liquid chromatography, See under Measurement techniques**
- Hippocampus, See under Brain**
- Histamine**  
as biochemical marker of anaphylactoid reactions to drugs (CI) [Laroche, Vergnaud, Sillard, Soufarapis & Bricard], 945
- History**  
a second Sir Humphrey Davy? (CO) [Hool], 705  
a second Sir Humphrey Davy? (CO) [Saidman], 705
- Hormones**  
**adrenal**  
cortisol  
levels of, following alfentanil infusion for postoperative pain (CI) [Camu & Debucquoy], 171
- antidiuretic**  
vasopressin  
does magnesium sulfate alter maternal cardiovascular response to? (LI) [Sipes, Chestnut, Vincent, Weiner, Thompson & Chatterjee], 1010
- epinephrine**  
in study of halothane and atrial pacemaker automaticity (LI) [Polic, Atlee, Laszio, Kampine & Bosnjak], 298
- norepinephrine**  
in study of halothane and atrial pacemaker automaticity (LI) [Polic, Atlee, Laszio, Kampine & Bosnjak], 298
- parathyroid hormone**  
responses to hypocalcemia during cardiopulmonary bypass (CI) [Robertie, Butterworth, Royster, Preilipp, Dudas, Black, Cole & Zaloga], 43
- prostaglandins**  
thromboxane  
constriction of trachea in response to oxybarbiturates and thio-barbiturates mediated by (LI) [Curry, Lenox, Spannake & Hirshman], 679
- thromboxane  $\text{A}_2$**   
nitric acid prevents pulmonary hypertension induced by, during heparin-protamine reaction (LI) [Fratacci, Frostell, Chen, Wain, Robinson & Zapol], 990
- 5-Hydroxytryptamine, See under Serotonin**
- Hypercapnia, See under Carbon dioxide**
- Hypercapnic drive, See under Lung(s)**
- Hypercarbia, See under Carbon dioxide**
- Hyperesthesia, See under Nerve(s), injury**
- Hyperglycemia, See under Metabolism**
- Hyperkalemia, See under Ions, potassium**
- Hyperthermia**  
**malignant**  
diagnosis, laboratory  
and normal muscle calcium uptake (CR) [Jaffe, Martucci, Gronert, Elliott & Cardinet], 525  
dihydropyridine receptor and (CI) [Adnet, Krivosic-Horber, Adamantidis, Reyford, Cordonnier & Haudecoeur], 415

- molecular genetic diagnosis of, and caffeine halothane muscle contracture test (CI) [MacKenzie, Allen, Lahey, Crossan, Nolan, Mettler, Worton, MacLennan & Korneluk], 4
- molecular genetics and (EV) [Levitt, Meyers, Fletcher & Rosenberg], 1
- and propofol in Duchenne muscular dystrophy (CO) [Ginsburg, Porterfield & Lippman], 376
- during sevoflurane anesthesia in child with central core disease (CR) [Otsuka, Komura, Mayumi, Yamamura, Kemmotsu & Mukaida], 699
- suppression of arrhythmias during treatment of, dantrolene in (CI) [Kentsch, Roewer, Kunze & Kuck], 583
- Hypertonic saline, *See under Shock***
- Hypnotics**
- barbiturates**
    - pentobarbital
      - pharmacodynamics of, influence of cryogenic brain injury on (LI) [Archer, Priddy, Tang, Sabourin & Samanani], 634
  - benzodiazepines**
    - midazolam
      - flumazenil reversal of (CI) [Gross, Weller & Conard], 179
      - neurotoxicity in rabbit (LI) [Malinovsky, Cozian, Lepage, Musini, Pinaud & Souron], 91
- Hypocapnia, *See under Carbon dioxide***
- Hypotension, *See under Anesthetic techniques; Blood pressure; Complications***
- Hypothalamus, *See under Brain***
- Hypothermia**
- cerebral metabolism during (LI) [Michenfelder & Milde], 130
  - isoflurane, and light reflex (CI) [Larson, Sessler, McGuire & Hynson], 62
  - mild perianesthetic, physiologic responses to (CI) [Sessler, Rubinstein & Moayeri], 594
  - and serum potassium concentration (CO) [Sprung, Cheng & Bosnjak], 164
- Hypoxia, *See under Complications***
- among experts (CO) [Roy], 915
  - in volatile anesthetics and hepatic artery ligation (LI) [Fujita, Kimura, Hamada & Takaori], 313
- I**
- Illuminating stylet, *See under Equipment***
- Immune response**
- anaphylactoid**
    - tryptase
      - as biochemical marker of anaphylactoid reactions to drugs (CI) [Laroche, Vergnaud, Sillard, Soufarapis & Bricard], 945
      - and effect of dopamine on renal function in liver transplantation (CI) [Swygert, Roberts, Valek, Brajtford, Brown, Gunning, Paulsen & Ramsay], 571
- Immunology**
- colony-stimulating factors**
    - G-CSF
      - anesthetic considerations in patients receiving (CR) [Tobias & Furman], 536
    - GM-CSF
      - anesthetic considerations in patients receiving (CR) [Tobias & Furman], 536
- Indocyanine green clearance, *See under Liver; Measurement techniques***
- Indomethacin, *See under Pharmacology***
- Infection**
- tetanus**
    - undiagnosed, intractable pharyngeal spasm following tracheal extubation in (CR) [Baronia, Singh & Dhiman], 1111
- Inhalational anesthesia, *See under Anesthetic techniques***
- Inhibition, *See under Metabolism***
- Inspiratory pressure support, *See under Ventilation***
- Insulin, *See under Metabolism***
- Intensive care**
- critical care**
    - and ventilation-perfusion ratios in obstructive pulmonary disease (CI) [Beydon, Cinotti, Rekik, Radermacher, Adnot, Meignan, Harf & Lemaire], 730
- Interactions (drug)**
- additivity**
    - of nitrous oxide to isoflurane MAC in infants and children (CI) [Murray, Mehta & Forbes], 186
  - alfentanil (LR) [Kharasch, Hill & Eddy], 520
  - midazolam and/or butorphanol (CO) [Dershwitz, Rosow, DiBiase & Zaslavsky], 707
  - midazolam and/or butorphanol (CO) [Kestin], 706
  - midazolam and/or butorphanol (CO) [Sosis], 706
- Internal jugular vein cannulation, *See under Anesthetic techniques***
- Internal jugular vein catheterization, *See under Anesthetic techniques***
- Intracranial pressure, *See under Brain***
- Intrathecal analgesics, *See under Analgesics***
- Intravenous anesthesia, *See under Anesthetic techniques***
- Intubation**
- difficult**
    - in Larsen's syndrome (CR) [Stevenson, Hall & Palmieri], 142
  - tracheal**
    - awake
      - in management of difficult adult airway (MI) [Benumof], 1087
    - direct vision
      - in management of difficult adult airway (MI) [Benumof], 1087
    - fiberoptic
      - in management of difficult adult airway (MI) [Benumof], 1087
    - retrograde
      - in management of difficult adult airway (MI) [Benumof], 1087
    - additional safety measures when changing endotracheal tubes (CO) [Benumof], 921
- Ions**
- calcium**
    - calcium agonist
      - BAY K8644, effects of, on skeletal muscle from patients susceptible to malignant hyperthermia (CI) [Adnet, Krivosic-Horber, Adamantidis, Reyford, Cordonnier & Haudecoeur], 415
    - calcium-channel blocking drugs
      - halothane depresses binding to bovine heart sarcolemma (LI) [Hoehner, Quigg & Blanck], 1019
    - channel blocking effects
      - on cardiac conduction system, intravenous dantrolene does not exhibit (CI) [Kentsch, Roewer, Kunze & Kuck], 583
      - effects of, on skeletal muscle from patients susceptible to malignant hyperthermia (CI) [Adnet, Krivosic-Horber, Adamantidis, Reyford, Cordonnier & Haudecoeur], 415
      - halothane effects on, in myocytes (LI) [Wilde, Knight, Sheth & Williams], 1075
      - and hypocalcemia during cardiopulmonary bypass (CI) [Robertie, Butterworth, Royster, Preilipp, Dudas, Black, Cole & Zaloga], 43

should it be administered prior to separation from cardiopulmonary bypass (CO) [Butterworth, Royster, Prielipp & Zaloga], 1121

should it be administered prior to separation from cardiopulmonary bypass (CO) [Hosking], 1121

#### calcium blockers

##### tetrodotoxin

in study of anesthetics and coronary flow reserve (LI) [Larach & Schuler], 268

#### magnesium

##### magnesium sulfate

and vasopressors in gravid ewes (LI) [Sipes, Chestnut, Vincent, Weiner, Thompson & Chatterjee], 1010

and hypocalcemia during cardiopulmonary bypass (CI) [Robertie, Butterworth, Royster, Prielipp, Dudas, Black, Cole & Zaloga], 43

#### potassium

##### hyperkalemia

in disuse-related potassium efflux to succinylcholine (LI) [Fung, White, Jones & Gronert], 650

concentration, hypothermia and (CO) [Sprung, Cheng & Bosnjak], 164

#### sodium

residual fast channels in human atrial muscle, halothane inhibits (CO) [Chou, Wei & Lin], 716

**Ischemia, See under Brain**

**Isoflurane, See under Anesthetics, volatile**

## J

**Jet stylet, See under Equipment**

#### Journals

##### Anesthesiology

truth in advertising and (CO) [Atkins], 547

truth in advertising and (CO) [Zapol], 547

##### ethics in publishing

and the "operator" (CO) [Knill], 545

and the "operator" (CO) [Smith, Miller, Saidman & Morgan], 545

## K

**Ketamine, See under Anesthetics, intravenous; Anesthetics, oral**

#### Kidney

##### adrenal medulla

response to hemorrhagic hypotension, spinal blockade altering (LI) [Jordan & Miller], 654

##### extracorporeal shock wave lithotripsy

hypoxemia after, in adult due to pulmonary contusion induced by (CR) [Malhotra, Rosen & Slepian], 529

#### failure

##### acute

in liver transplant recipients, effect of dopamine on (CI) [Swygert, Roberts, Valek, Brajtbor, Brown, Gunning, Paulsen & Ramsay], 571

##### chronic

in liver transplant recipients, effect of dopamine on (CI) [Swygert, Roberts, Valek, Brajtbor, Brown, Gunning, Paulsen & Ramsay], 571

#### hemofiltration

##### continuous arteriovenous

management of peripartum congestive heart failure using, in patient with myotonic dystrophy (CR) [Dodds, Haney & Appleton], 907

## L

**L-659,066, See under Sympathetic nervous system,  $\alpha_2$ -adrenergic agonists**

#### Labor

preterm, *See under Pregnancy*

**Lactate, See under Metabolism**

**Larsen's syndrome, See under Complications**

**Laryngeal mask, See under Equipment**

**Laryngeal mask airway, See under Equipment**

**Laryngoscopes, See under Equipment**

**Laryngoscopy, See under Surgery**

**Lasers, See under Equipment**

**Learning, See under Anesthesia, depth**

**Left ventricular pressure, See under Heart**

**Lidocaine, See under Anesthetics, local; Pharmacodynamics, protein binding, lidocaine**

**Lithotomy, See under Position**

#### Liver

##### blood flow

in hepatic artery ligation, volatile anesthetics and (LI) [Fujita, Kimura, Hamada & Takaori], 313

##### indocyanine green clearance

in use of volatile anesthetics in hepatic artery ligation (LI) [Fujita, Kimura, Hamada & Takaori], 313

**L-Medetomidine, See under Sympathetic nervous system**

**Long QT syndrome, See under Heart**

**Low-flow anesthetic techniques, See under Anesthetic techniques**

#### Lung(s)

##### circulation

and endogenous nitrovasodilator and new cellular messenger (EV) [Johns], 927

in protamine-induced right-to-left intracardiac shunting (CR) [Cheung, Weiss & Savino], 904

and pulmonary vasoregulation posthypoperfusion (LI) [Fehr, Nyhan, Chen & Murray], 257

in response to desflurane, in infants and children (CI) [Taylor & Lerman], 975

and thromboxane-induced pulmonary edema (LI) [Wakerlin, Benson & Pearl], 475

##### compliance

neonatal, can anesthesiologists assess changes in manually (LR) [Spears, Yeh, Fisher & Zwass], 693

pediatric anesthesiologist and (EV) [Steward], 555

after sufentanil-pancuronium induction sequences (CI) [Horrow, Abrams, Van Riper, Lambson & Storella], 969

##### complications

postsurgical, following combined epidural and general anesthesia or general anesthesia (CI) [Baron, Bertrand, Barré, Godet, Mundler, Coriat & Viars], 611

##### function

and ventilation-perfusion ratios in obstructive pulmonary disease (CI) [Beydon, Cinotti, Rekik, Radermacher, Adnot, Meignan, Harf & Lemaire], 730

##### hypercapnic drive

and ventilation after propofol and thiopental (CI) [Blouin, Conard & Gross], 940

##### hypertension

in protamine-induced right-to-left intracardiac shunting (CR) [Cheung, Weiss & Savino], 904

##### intrapulmonary oxygen consumption

in patients with pneumonia (CI) [Gea, Roca, Torres, Agusti, Wagner & Rodriguez-Roisin], 782

- pneumonia**
  - mechanisms of abnormal gas exchange in patients with (CI) [Gea, Roca, Torres, Agusti, Wagner & Rodriguez-Roisin], 782
- pulmonary capillary pressure**
  - and thromboxane-induced pulmonary edema (LI) [Wakerlin, Benson & Pearl], 475
- pulmonary disease**
  - obstructive
    - and work of breathing caused by endotracheal tube (CI) [Brochard, Rua, Lorino, LeMaire & Harf], 739
- pulmonary edema**
  - thromboxane-induced (LI) [Wakerlin, Benson & Pearl], 475
- pulmonary hypertension**
  - and thromboxane-induced pulmonary edema (LI) [Wakerlin, Benson & Pearl], 475
- pulmonary vascular resistance**
  - and thromboxane-induced pulmonary edema (LI) [Wakerlin, Benson & Pearl], 475
- respiratory failure**
  - and ventilation-perfusion ratios in obstructive pulmonary disease (CI) [Beydon, Cinotti, Rekik, Radermacher, Adnot, Meignan, Harf & Lemaire], 730
- transplant**
  - perioperative management of patients receiving (CO) [Heerdts & Triantafyllou], 922
- vascular resistance**
  - inhaled nitric oxide prevents heparin-protamine vasoconstriction (LI) [Fratacci, Frostell, Chen, Wain, Robinson & Zapol], 990
- venoconstriction**
  - and thromboxane-induced pulmonary edema (LI) [Wakerlin, Benson & Pearl], 475
- venous admixture**
  - in patients with pneumonia (CI) [Gea, Roca, Torres, Agusti, Wagner & Rodriguez-Roisin], 782
- ventilation**
  - after propofol and thiopental (CI) [Blouin, Conard & Gross], 940
- ventilation-perfusion ratios**
  - in obstructive pulmonary disease (CI) [Beydon, Cinotti, Rekik, Radermacher, Adnot, Meignan, Harf & Lemaire], 730
- ventilation-perfusion relationships**
  - in patients with pneumonia (CI) [Gea, Roca, Torres, Agusti, Wagner & Rodriguez-Roisin], 782

## M

- MAC, See under Potency, anesthetic**
- Magnesium, See under Ions**
- Magnesium sulfate, See under Ions, magnesium**
- Magnetic resonance imaging, See under Measurement techniques**
- Malignant hyperthermia, See under Complications; Hyperthermia**
- Manual ventilation, See under Ventilation**
- Masks, See under Equipment**
- Measurement techniques**
  - activated partial thromboplastin time**
    - value of, for preoperative detection of coagulation disorders, questionnaire for (CO) [Janvier, Winnock & Freyburger], 920
  - blood pressure**
    - for continuous noninvasive finger blood pressure during controlled hypotension (CI) [Epstein, Bartkowski & Huffnagle], 796

## Doppler

- in assessment of physiologic responses to mild perianesthetic hypothermia in humans (CI) [Sessler, Rubinstein & Moayeri], 594

## echocardiography

- intraoperative, during pericardiotomy (CR) [Hogue, Platin, Barzilai & Kaiser], 701
- transesophageal and two-dimensional measurement of pulmonary blood flow with (CI) [Savino, Troianos, Aukburg, Weiss & Reichel], 445
- two-dimensional transesophageal contrast assessment of myocardial perfusion during coronary artery bypass graft surgery (CI) [Aronson, Lee, Wiencek, Feinstein, Roizen, Karp & Ellis], 433

## electromyography

- in assessment of diaphragmatic contractility under atracurium (LI) [Goldman, Road & Grassino], 123
- in assessment of physiologic responses to mild perianesthetic hypothermia in humans (CI) [Sessler, Rubinstein & Moayeri], 594

## flow cytometry

- in assessment of platelet activation and aggregation during cardiopulmonary bypass (CI) [Rinder, Bohnert, Rinder, Mitchell, Ault & Hillman], 388
- in assessment of platelet surface adhesion during cardiopulmonary bypass (CI) [Rinder, Mathew, Rinder, Bonan, Ault & Smith], 563

## high-pressure liquid chromatography

- in study of influence of cryogenic brain injury on pharmacodynamics of pentobarbital (LI) [Archer, Priddy, Tang, Saborin & Samanani], 634

## indocyanine green clearance

- in use of volatile anesthetics in hepatic artery ligation (LI) [Fujita, Kimura, Hamada & Takaori], 313

## magnetic resonance imaging

- pulse oximetry during, burns associated with (CO) [Bashein & Syrov], 382

## multiple inert gas elimination

- in patients with pneumonia (CI) [Gea, Roca, Torres, Agusti, Wagner & Rodriguez-Roisin], 782

## myelography

- headache following, unusual cause of (CR) [Parlow & Einarson], 145

## oximetry

- in airway obstruction in former premature infants (CI) [Kurth & LeBard], 22
- during external compression of abdominal aorta for reversal of Tetralogy of Fallot cyanotic crisis (CR) [Baele, Rennotte & Veyckemans], 146

## phlethysmography

- in assessment of physiologic responses to mild perianesthetic hypothermia in humans (CI) [Sessler, Rubinstein & Moayeri], 594

## platelet adhesion

- during cardiopulmonary bypass (CI) [Rinder, Mathew, Rinder, Bonan, Ault & Smith], 563

## pneumography

- in airway obstruction in former premature infants (CI) [Kurth & LeBard], 22

## pulse oximetry

- in congenital heart disease (CI) [Fletcher], 210

- radioimmunoassay**  
to determine etiology and drugs responsible for fatal anaphylaxis during anesthesia (CR) [Fisher, Baldo & Silbert], 1112
- Read rebreathing method**  
in assessment of flumazenil reversal of midazolam (CI) [Gross, Weller & Conard], 179
- receptor gene**  
of susceptibility to malignant hyperthermia (CI) [MacKenzie, Allen, Lahey, Crossan, Nolan, Mettler, Worton, MacLennan & Korneluk], 4
- sensitivity**  
malignant hyperthermia and (CR) [Jaffe, Martucci, Gronert, Elliott & Cardinet], 525
- sonomicrometry**  
in assessment of diaphragmatic contractility under atracurium (LI) [Goldman, Road & Grassino], 123
- specificity**  
malignant hyperthermia and (CR) [Jaffe, Martucci, Gronert, Elliott & Cardinet], 525
- thermodilution**  
in determination of pulmonary blood flow with (CI) [Savino, Troianos, Aukburg, Weiss & Reichek], 445
- tonometry**  
during anesthesia (LR) [Kemmons, Ueda, Otsuka, Yamamura, Winter & Eckerle], 333
- Mechanical ventilation, See under Ventilation**
- Medical records, See under Records**
- Memory**  
and alteration of autonomy site by injury prior to neurectomy (LI) [Katz, Vaccarino, Coderrec & Melzack], 876  
therapeutic suggestions for improved, during general anesthesia (CI) [Block, Ghoneim, Ping & Ali], 746
- Meninges, See under Spinal cord**
- Metabolism**  
**alfentanil**  
human liver microsomal, influence of dexmedetomidine and clonidine on (LR) [Kharasch, Hill & Eddy], 520  
**arachidonic acid**  
and pulmonary edema (LI) [Wakerlin, Benson & Pearl], 475  
**diabetes**  
effects of insulin infusion on plasma and brain glucose in (LI) [Hofer & Lanier], 673  
**glucose**  
brain  
effects of insulin infusion on, in hyperglycemic diabetic rats (LI) [Hofer & Lanier], 673  
**hyperglycemia**  
effects of insulin infusion on plasma and brain glucose in (LI) [Hofer & Lanier], 673  
little risk of hyperosmolar coma following, during cardiopulmonary bypass (CO) [Alberti], 913  
little risk of hyperosmolar coma following, during cardiopulmonary bypass (CO) [Hirsch & White], 912  
little risk of hyperosmolar coma following, during cardiopulmonary bypass (CO) [Metz], 912  
**inhibition**  
hippocampal, propofol and (LI) [Albertson, Tseng & Joy], 82  
**insulin**  
effects of infusion of, on plasma and brain glucose in hyperglycemic diabetic rats (LI) [Hofer & Lanier], 673  
**lactate**  
production  
myocardial, and ischemia during acute coronary artery occlusion (LI) [Moore, Kien, Reitan, White & Safwat], 854  
**streptozocin**  
to induce diabetes, in study of effects of insulin infusion on plasma and brain glucose, in rats (LI) [Hofer & Lanier], 673  
**thromboxane**  
and pulmonary edema (LI) [Wakerlin, Benson & Pearl], 475  
**U46619**  
and pulmonary edema (LI) [Wakerlin, Benson & Pearl], 475  
**Methemoglobinemia, See under Complications**  
**Methohexital, See under Anesthetics, intravenous**  
**Methylparaben, See under Preservatives**  
**Midazolam, See under Anesthetics, intravenous; Anesthetics, oral; Hypnotics, benzodiazepines**  
**Minimum alveolar concentration, See under Potency, anesthetic**  
**MK-801, See under Antagonists, dizocilpine**  
**Molecular biology, See under Genetic factors**  
**Molecular genetics, See under Genetics**  
**Monitoring**  
**blood pressure**  
for continuous noninvasive finger blood pressure during controlled hypotension (CI) [Epstein, Bartkowski & Hufnagle], 796  
**cardiac output**  
with transesophageal two-dimensional and Doppler echocardiography (CI) [Savino, Troianos, Aukburg, Weiss & Reichek], 445  
**echocardiography**  
transesophageal  
in diagnosis of aortic dissection during cardiac surgery (CR) [Troianos, Savino & Weiss], 149  
intraoperative, ventilator-induced right-to-left intracardiac shunt during (CR) [Jaffe, Pinto, Schnittger & Brock-Utne], 153  
during protamine-induced right-to-left intracardiac shunting (CR) [Cheung, Weiss & Savino], 904  
and altered load dependence of postischemic myocardium (LI) [Buffington & Coyle], 464  
**electrocardiography**  
ST-segment elevation during (CR) [Whitten, Latson, Cochran, Elmore & Griffin], 161  
**electroencephalography**  
during carotid endarterectomy (CI) [Lam, Manninen, Ferguson & Nantau], 15  
and changes in arterial carbon dioxide tension during alfentanil/nitrous oxide anesthesia (CI) [Kalkman, Boezeman, Ribberink, Oosting, Deen & Bovill], 68  
**end-tidal concentration**  
in response to desflurane, in infants and children (CI) [Taylor & Lerman], 975  
**evoked potentials**  
somatosensory  
and changes in arterial carbon dioxide tension during alfentanil/nitrous oxide anesthesia (CI) [Kalkman, Boezeman, Ribberink, Oosting, Deen & Bovill], 68  
intrathecal morphine and (CI) [Schubert, Licina, Lineberry & Deers], 401  
during carotid endarterectomy (CI) [Lam, Manninen, Ferguson & Nantau], 15  
**fetal heart rate**  
after epidural anesthesia (CI) [Loftus, Holbrook & Cohen], 406  
**neuromuscular blockade**  
train-of-four count and reliability of antagonism of (CI) [Kopman], 588

**noninvasive blood pressure monitors**  
peripheral nerve injury and (CO) [Schaer], 381

**oximetry**  
effects of anemia on, in dogs (LI) [Lee, Tremper & Barker], 118

**pericardial effusion**  
intraoperative, during pericardiotomy (CR) [Hogue, Platin, Barzilai & Kaiser], 701

**pressure-flow plots**  
and pulmonary vasoregulation posthypoperfusion (LI) [Fehr, Nyhan, Chen & Murray], 257

**pulmonary blood flow**  
with transesophageal two-dimensional and Doppler echocardiography (CI) [Savino, Troianos, Aukburg, Weiss & Reichek], 445

**pulse oximetry**  
during magnetic resonance imaging, burns associated with (CO) [Bashein & Syrov], 382  
pigtail (CO) [Jantzen & Hennes], 707

**stump pressure**  
during carotid endarterectomy (CI) [Lam, Manninen, Ferguson & Nantau], 15  
during external compression of abdominal aorta for reversal of Tetralogy of Fallot cyanotic crisis (CR) [Baele, Rennotte Veyckemans], 146

**Monitors, See under Equipment**

**Morphine, See under Analgesics; Analgesics, intrathecal; Analgesics, opioid; Analgesics, opioids**

**Motor point block, See under Anesthetic techniques**

**Multiple inert gas elimination, See under Measurement techniques**

**Muscle**  
**cardiac**  
sarcolemma  
bovine, halothane depresses D600 binding to (LI) [Hoehner, Quigg & Blanck], 1019

**contractility**  
diaphragmatic, recovery of, from partial paralysis (LI) [Goldman, Road & Grassino], 123

**diaphragm**  
contractility, recovery of, from partial paralysis (LI) [Goldman, Road & Grassino], 123

**disuse**  
resistance to nondepolarizing relaxants  
and potassium efflux to succinylcholine (LI) [Fung, White, Jones & Gronert], 650

**myotonic dystrophy**  
management of peripartum congestive heart failure in patient with (CR) [Dodds, Haney & Appleton], 907

**skeletal**  
diaphragm  
mechanisms of displacement of, during spontaneous breathing (CO) [Sprung & Rodarte], 916

**paralysis**  
partial, effects of, on swallowing reflex in conscious humans (CI) [Isono, Ide, Kochi, Mizuguchi & Nishino], 980

**smooth**  
endothelium-derived relaxing factor  
effects of protamine (LI) [Akata, Yoshitake, Nakashima & Itoh], 833  
inhaled, prevents heparin-protamine vasoconstriction (LI) [Fratacci, Frostell, Chen, Wain, Robinson & Zapol], 990

**vascular smooth muscle**  
vasodilation  
by volatile anesthetics, coronary flow reserve and (LI) [Larach & Schuler], 268

**Myelography, See under Measurement techniques**

**Myeloscope, fiberoptic, See under Equipment**

**Myocardial infarction, See under Heart**

**Myocardial ischemia, See under Heart**

**Myocardial metabolism, See under Heart**

**Myocardial oxygen consumption, See under Heart**

**Myocardial performance, See under Heart**

**Myocardial perfusion, See under Heart**

**Myotonic dystrophy, See under Muscle**

## N

**Nalbuphine, See under Analgesics; Analgesics, opioid**

**Nasal reflexes, See under Reflexes**

**Nasopharyngeal airway, See under Equipment**

**n-butyl-p-aminobenzoate, See under Anesthetics, local**

**Neck, See under Anatomy**

**Needles, See under Equipment**

**Negative introp, See under Heart**

**Neonatal anesthesia, See under Anesthesia**

**Neonates, See under Anesthesia, pediatric**

**Nerve palsy, See under Complications**

**Nerve(s)**  
**deafferentation**  
alters pattern of autonomy in rats (LI) [Katz, Vaccarino, Corderrec & Melzack], 876

**injury**  
hyperesthesia  
spinal pharmacology of, induced by incomplete ligation of sciatic nerve (LI) [Yamamoto & Yaksh], 817

**plasticity**  
alters pattern of autonomy in rats (LI) [Katz, Vaccarino, Corderrec & Melzack], 876

**potassium channel blockade**  
tetraethylammonium  
potentiates impulse inhibition by local anesthetics (LI) [Drachman & Strichartz], 1051

**sensitization**  
alters pattern of autonomy in rats (LI) [Katz, Vaccarino, Corderrec & Melzack], 876

**Neuroblastoma, See under Sympathetic nervous system, catecholamines**

**Neurologic complications, See under Complications**

**Neuromuscular blockade, See under Monitoring**

**Neuromuscular blocking agents, See under Neuromuscular relaxants**

**Neuromuscular relaxants**  
**atracurium**  
diaphragmatic contractility under (LI) [Goldman, Road & Grassino], 123  
neuromuscular blockade by, train-of-four count and reliability of antagonism of (CI) [Kopman], 588

**dantrolene**  
and cardiac conduction system in humans (CI) [Kentsch, Roewer, Kunze & Kuck], 583

**neuromuscular blocking agents**  
swallowing reflex and (CI) [Isono, Ide, Kochi, Mizuguchi & Nishino], 980

**ORG9426**  
neuromuscular effects of, in patients receiving balanced anesthesia (CI) [Foldes, Nagashima, Nguyen, Schiller, Mason & Ohta], 191

- pancuronium  
sufentanil induction sequences, ventilatory compliance after (CI)  
[Horrow, Abrams, Van Riper, Lambson & Storella], 969
- succinylcholine  
onset of disuse-related potassium efflux to (LI) [Fung, White,  
Jones & Gronert], 650  
in study of the influence of paraben preservatives on intracranial  
pressure in cats (LI) [Pompy, Karlin, Capuano, Cottrell &  
Hartung], 669
- vecuronium  
neuromuscular blockade by, train-of-four count and reliability of  
antagonism of (CI) [Kopman], 588
- Neurons, *See under Brain*
- Neurosurgical anesthesia, *See under Anesthesia*
- Neurotoxicity, *See under Complications; Toxicity*
- Neurotransmitters, *See under Brain*
- Neutropenia, *See under Blood*
- Nifedipine, *See under Heart; Pharmacology, calcium antagonists*
- Nitric acid, *See under Pharmacology, endothelium-derived relax-  
ing factor*
- Nitrous oxide, *See under Anesthetics, gases*
- NMDA, *See under Pharmacology*
- Nondopaminergic neurons, *See under Brain*
- Noninvasive blood pressure monitors, *See under Equipment; Moni-  
toring*
- Norepinephrine, *See under Hormones; Sympathetic nervous sys-  
tem; Sympathetic nervous system, catecholamines*

## O

- Obstetric anesthesia, *See under Anesthesia*
- Obstructive pulmonary disease, *See under Lung(s)*
- One lung ventilation, *See under Anesthetic techniques*
- "Operator syndrome" in research, *See under Research*
- Opioid analgesia, *See under Analgesia*
- Opioid analgesics, *See under Analgesics*
- Opioid receptors, *See under Receptors*
- Opioids, *See under Analgesics*
- Oral anesthetics, *See under Anesthetics*
- ORG9426, *See under Neuromuscular relaxants*
- Organizations  
American Society of Anesthesiologists  
ASA award: John F. Nunn (SA) [Fink], 560  
Reports of Scientific Meetings  
Human Error in Anesthesia (SM), 553
- Oropharyngeal airway, *See under Equipment*
- Ouabain, *See under Heart; Pharmacology*
- Outpatient anesthesia, *See under Anesthesia*
- Oximetry, *See under Measurement techniques; Monitoring*
- Oxygen  
measurement techniques  
hyperventilation reduces (CI) [Barker, Hyatt, Clarke &  
Tremper], 619
- perfusion  
hyperventilation reduces (CI) [Barker, Hyatt, Clarke &  
Tremper], 619
- transcutaneous  
hyperventilation reduces (CI) [Barker, Hyatt, Clarke &  
Tremper], 619
- Oxygen consumption  
intrapulmonary, *See under Lung(s)*
- Oxygen saturation, *See under Hemoglobin*

## P

- Pacemaker, *See under Equipment; Heart*
- Pacemakers, *See under Heart*
- "Pacing thump", *See under Heart*
- Pain  
burning  
of Guillain-Barré syndrome, opioid analgesics and (CO) [Ennis],  
913  
of Guillain-Barré syndrome, opioid analgesics and (CO) [War-  
field], 914
- cancer  
blockade by n-butyl-p-aminobenzoate in (CI) [Korsten, Acker-  
man, Grouls, van Zundert, Bon, Bal, Crommelin, Ribot,  
Hoefsloot & Sloff], 950
- chronic nonmalignant  
neurolytic celiac plexus block for treatment of (CR) [Hastings &  
McKay], 156
- phantom limb  
injury before neurectomy alters autonomy site and (LI) [Katz,  
Vaccaro, Coderrec & Melzack], 876
- postoperative  
alfentanil for: epidural *versus* intravenous routes (CI) [Camu &  
Debucquoy], 171  
epidural morphine is safe on surgical wards (CI) [Ready, Loper,  
Nessly & Wild], 452  
and epidural nalbuphine or morphine after thoracotomy (CI)  
[Etches, Sandler & Lawson], 9  
intravenous clonidine for analgesia in (CI) [Bernard, Hommeril,  
Passuti & Pinaud], 577  
and site of hemodynamic effects of  $\alpha_2$ -adrenergic agonists (CO)  
[De Kock], 715
- Pancuronium, *See under Neuromuscular relaxants*
- Paralysis, *See under Muscle, skeletal*
- Papavarine, *See under Heart*
- Parasympathetic nervous system  
acetylcholine  
in study of bronchodilation and airway epithelium (LI) [Sayiner,  
Lorenz, Warner & Rehder], 75
- atropine  
dose-response for, and heart rate in children (CI) [Palmisano,  
Setlock, Brown, Siker & Tripuraneni], 238  
intravenous, in humans, clonidine and (CI) [Nishikawa & Dohi],  
217
- glycopyrrolate  
and central anticholinergic syndrome (CO) [Grum], 1126  
and central anticholinergic syndrome (CO) [Wingard], 1125
- scopolamine  
effect of, *versus* ischemia of AV node, in complete heart block  
during anesthesia in coronary artery disease (CR) [Park &  
Lowenstein], 367
- Parathyroid hormone, *See under Hormones*
- Patent foramen ovale, *See under Heart*
- Patient-controlled analgesia, *See under Analgesia*
- Pattern of ventilation, *See under Ventilation*
- Pediatric anesthesia, *See under Anesthesia*
- Pediatric surgery, *See under Surgery*
- Pentobarbital, *See under Anesthetics, intravenous; Hypnotics; bar-  
biturates*
- Perforant pathway, *See under Brain*
- Pericardial effusion, *See under Monitoring*
- Pericardiectomy, *See under Surgery*
- Peripheral nerve blood flow, *See under Circulation*
- Phantom limb, *See under Pain*

**Pharmacodynamics**

**ORG9426**

neuromuscular effects of, in patients receiving balanced anesthesia (CI) [Foldes, Nagashima, Nguyen, Schiller, Mason & Ohta], 191

**pentobarbital**

influence of cryogenic brain injury on (LI) [Archer, Priddy, Tang, Sabourin & Samanani], 634

**protein binding**

**lidocaine**

and drug access to site of action (EV) [Wood], 721

**Pharmacokinetics**

**amrinone**

during cardiac surgery (CI) [Bailey, Levy, Rogers, Szlam & Hug], 961

**distribution**

and closed-circuit anesthesia, computer simulation of (LR) [Lerou, Dirksen, Beneken Kolmer & Booij], 345

and prediction of isoflurane concentrations (CI) [Lerou, Dirksen, Beneken Kolmer, Booij & Borm], 230

**fentanyl**

absorption and bioavailability of (CI) [Streisand, Varvel, Stanski, LeMaire, Ashburn, Hague, Tarver & Stanley], 223

**protein binding**

effect of, on entry of lidocaine into brain and cerebrospinal fluid in dogs (LI) [Marathe, Shen, Artru & Bowdle], 804

**uptake**

and closed-circuit anesthesia, computer simulation of (LR) [Lerou, Dirksen, Beneken Kolmer & Booij], 345

and prediction of isoflurane concentrations (CI) [Lerou, Dirksen, Beneken Kolmer, Booij & Borm], 230

**$\alpha_1$ -acid glycoprotein**

effect of, on entry of lidocaine into brain and cerebrospinal fluid in dogs (LI) [Marathe, Shen, Artru & Bowdle], 804

**Pharmacology**

**adenosine**

in study of spinal pharmacology of hyperesthesia (LI) [Yamamoto & Yaksh], 817

and volatile anesthetics and coronary flow reserve (LI) [Larach & Schuler], 268

**amrinone**

inotropic effect of (CO) [Stowe], 380

during cardiac surgery (CI) [Bailey, Levy, Rogers, Szlam & Hug], 961

inotropic effect of (CO) [Lee & Virtusio], 380

**angiotensin II**

does magnesium sulfate alter maternal cardiovascular response to? (LI) [Sipes, Chestnut, Vincent, Weiner, Thompson & Chatterjee], 1010

**antipsychotic medication**

and spastic torticollis during general anesthesia (CR) [Stemp & Taswell], 365

**calcium antagonists**

**nifedipine**

effects of, on skeletal muscle from patients susceptible to malignant hyperthermia (CI) [Adnet, Krivosic-Horber, Adamantidis, Reyford, Cordonnier & Haudecoeur], 415

**verapamil**

effects of, on skeletal muscle from patients susceptible to malignant hyperthermia (CI) [Adnet, Krivosic-Horber, Adamantidis, Reyford, Cordonnier & Haudecoeur], 415

**calcium-channel blocking drugs**

**D600**

binding to bovine heart sarcolemma, halothane depresses (LI) [Hoehner, Quigg & Blanck], 1019

**gallopamil**

binding to bovine heart sarcolemma, halothane depresses (LI) [Hoehner, Quigg & Blanck], 1019

**cesium**

in study of effects of halothane on ventricular tachycardia in intact dogs (LI) [Gallagher & McClernan], 866

**clonidine**

intravenous, postoperative analgesia by (CI) [Bernard, Hommeril, Passuti & Pinaud], 577

**cyclosporines**

and effect of dopamine on renal function in liver transplantation (CI) [Swygert, Roberts, Valek, Brajtford, Brown, Gunning, Paulsen & Ramsay], 571

**dexmedetomidine**

antiarrhythmic effect of, on epinephrine-induced arrhythmias (CO) [Eisenach], 1116

antiarrhythmic effect of, on epinephrine-induced arrhythmias (CO) [Hayashi, Sumikawa, & Maze], 1116

**endothelium-derived relaxing factor**

**nitric acid**

inhaled, prevents heparin-protamine vasoconstriction (LI) [Fratacci, Frostell, Chen, Wain, Robinson & Zapol], 990

**nitric oxide**

and endogenous nitrovasodilator and new cellular messenger (EV) [Johns], 927

**indomethacin**

in study of posthypoperfusion pulmonary vasoregulation (LI) [Fehr, Nyhan, Chen & Murray], 257

**NMDA**

and isoflurane and dexmedetomidine in spinal cord (LI) [Savola, Woodley, Maze & Kendig], 489

**ouabain**

in study of effects of halothane on ventricular tachycardia in intact dogs (LI) [Gallagher & McClernan], 866

**phenol**

for motor point blocks in children (CR) [Morrison, Matthews, Washington, Fennessey & Harrison], 359

**tocolytic agents**

does magnesium sulfate alter maternal cardiovascular response to? (LI) [Sipes, Chestnut, Vincent, Weiner, Thompson & Chatterjee], 1010

**Pharyngeal spasm, See under Complications**

**Phenol, See under Pharmacology**

**Phenylephrine, See under Sympathetic nervous system; Sympathetic nervous system,  $\alpha_1$ -adrenergic agonists; Sympathetic nervous system, catecholamines**

**Phlethysmography, See under Measurement techniques**

**Pia mater, See under Spinal cord**

**Plasma, See under Blood**

**Plasticity, See under Nerve(s)**

**Platelet activation, See under Blood; Blood, coagulation**

**Platelet adhesion, See under Measurement techniques**

**Platelet aggregation, See under Blood; Blood, coagulation**

**Platelet function, See under Blood**

**Platelet glycoproteins, See under Blood; Blood, coagulation**

**Pneumography, See under Measurement techniques**

**Pneumonia, See under Lung(s)**

**Pneumothorax, See under Complications**



**Polypeptides****arginine-rich basic polypeptides**

and action of protamine on vascular tissues (LI) [Akata, Yoshitake, Nakashima & Itoh], 833

**Position****lithotomy**

prolonged, epidural opioid analgesia does not obscure diagnosis of compartment syndrome resulting from (CR) [Montgomery & Ready], 541

**prone**

quadraplegia in patient with cervical spondylosis after thoracolumbar surgery in (CR) [Deem, Shapiro & Marshall], 527

**Positive end-expiratory pressure, *See under* Ventilation****Postoperative analgesia, *See under* Analgesia****Postoperative pain, *See under* Pain****Potassium, *See under* Ions****Potassium channel blockade, *See under* Nerve(s)****Potency****analgesic****tolerance**

acute, to opioids, is not related to their potency (LI) [Kissin, Brown & Bradley], 813

**anesthetic****age factors**

and contribution of nitrous oxide to isoflurane MAC in children (CI) [Murray, Mehta & Forbes], 186

and induction dose of propofol in infants and children (CO) [Borgeat, Wilder-Smith & Tassonyi], 550

and induction dose of propofol in infants and children (CO) [Westrin], 550

**MAC**

of desflurane in infants and children (CI) [Taylor & Lerman], 975

isoflurane in children, contribution of nitrous oxide to (CI) [Murray, Mehta & Forbes], 186

**Prazosin, *See under* Sympathetic nervous system,  $\alpha_1$  adrenergic antagonists****Pregnancy****preterm labor**

magnesium sulfate and vasopressors (LI) [Sipes, Chestnut, Vincent, Weiner, Thompson & Chatterjee], 1010

**Premedication****D-medetomidine**

hemodynamic actions of (LI) [Schmeling, Kampine, Roerig & Warltier], 499

**Preoperative care****preoperative evaluation**

of coagulation disorders, value of activated partial thromboplastin time for (CO) [Janvier, Winnock & Freyburger], 920

**Preoperative evaluation, *See under* Anesthesia; Preoperative care****Preoperative testing, *See under* Testing****Preservatives****methylparaben**

does not increase intracranial pressure in cats (LI) [Pompy, Karlin, Capuano, Cottrell & Hartung], 669

**propylparaben**

does not increase intracranial pressure in cats (LI) [Pompy, Karlin, Capuano, Cottrell & Hartung], 669

**Pressure work index, *See under* Heart****Pressure-flow plots, *See under* Monitoring****Pressure-rate quotient, *See under* Heart, ischemia****Preterm labor, *See under* Pregnancy****Prone position, *See under* Position****Propofol, *See under* Anesthetics, intravenous****Propylparaben, *See under* Preservatives****Prostaglandins, *See under* Hormones****Protamine, *See under* Blood, coagulation****Protein binding, *See under* Pharmacokinetics; Protein(s)****Protein(s)****protein binding**

of ropivacaine, by pregnant ewes (LI) [Santos, Arthur, Pedersen, Morishima, Finster & Covino], 137

**ryanodine receptor**

and susceptibility to malignant hyperthermia, caffeine halothane muscle contracture test of (CI) [MacKenzie, Allen, Lahey, Crossan, Nolan, Mettler, Worton, MacLennan & Korneluk], 4

**Publishing, *See under* Journals****Pulmonary blood flow monitoring, *See under* Monitoring****Pulmonary capillary pressure, *See under* Lung(s)****Pulmonary circulation, *See under* Circulation; Lung(s)****Pulmonary compliance, *See under* Lung(s)****Pulmonary contusion, *See under* Complications****Pulmonary disease, obstructive, *See under* Lung(s)****Pulmonary edema, *See under* Lung(s)****Pulmonary hypertension, *See under* Complications; Lung(s)****Pulmonary vascular resistance, *See under* Lung(s)****Pulse oximetry, *See under* Measurement techniques; Monitoring****Pupillary reflexes, *See under* Reflexes****Purkinje fibers, *See under* Heart****Q****Quadraparesis, *See under* Complications****R****Radioimmunoassay, *See under* Measurement techniques****Rate pressure product, *See under* Heart****Read rebreathing method, *See under* Measurement techniques****Recall, *See under* Anesthesia, depth****Receptor gene measurement techniques, *See under* Measurement techniques****Receptors****adrenergic** **$\alpha_1$** 

antagonizes  $\alpha_2$  (LI) [Guo, Tinklenberg, Olikier & Maze], 252

 **$\alpha_2$** 

is antagonized by  $\alpha_1$  (LI) [Guo, Tinklenberg, Olikier & Maze], 252

 **$\alpha$ -adrenergic**

and spinal pharmacology of hyperesthesia (LI) [Yamamoto & Yaksh], 817

 **$\alpha_2$ -adrenergic receptors**

stimulation of, dexmedetomidine prevents epinephrine-induced arrhythmias through (LI) [Hayashi, Sumikawa, Maze, Yamatodani, Kamibayashi, Kuro & Yoshiya], 113

 **$\alpha_2$  agonists**

effects of, on systemic and coronary hemodynamics in conscious dogs (LI) [Schmeling, Kampine, Roerig & Warltier], 499

**benzodiazepines****GABA**

transmission by, in rat brain, propofol and (LI) [Peduto, Concas, Santoro, Biggio & Gessa], 1000

**GABA-B**

and spinal pharmacology of hyperesthesia (LI) [Yamamoto & Yaksh], 817

**glutamate**

and ischemic brain damage (LI) [Nellgård, Gustafson & Wieloch], 279

**opioid**

and spinal pharmacology of hyperesthesia (LI) [Yamamoto & Yaksh], 817

**up-regulation**

and onset of disuse-related potassium efflux to succinylcholine (LI) [Fung, White, Jones & Gronert], 650

**Records**

**anesthesia**

data processing, automatic for minimal-flow system for xenon anesthesia (LR) [Luttrupp, Rydgren, Thomasson & Werner], 896

**medical**

**automation**

*versus* personal interview (CI) [Lutner, Roizen, Stocking, Thisted, Kim, Duke, Pompei & Cassel], 394

**Reflexes**

**baroreceptor**

halothane depression of, in growing piglets (LI) [Palmisano, Clifford, Hoffmann, Seagard, Coon & Kampine], 512

**clonus**

evaluation of, in response to mild perianesthetic hypothermia in humans (CI) [Sessler, Rubinstein & Moayeri], 594

**deep tendon**

evaluation of, in response to mild perianesthetic hypothermia in humans (CI) [Sessler, Rubinstein & Moayeri], 594

**nasal**

and nasal insufflation of volatile anesthetics in anesthetized humans (CI) [Nishino, Tanaka, Ishikawa & Hiraga], 441

**pupil**

light, isoflurane, but not mild hypothermia, depresses (CI) [Larson, Sessler, McGuire & Hynson], 62

**spasticity**

evaluation of, in response to mild perianesthetic hypothermia in humans (CI) [Sessler, Rubinstein & Moayeri], 594

**spinal**

**abnormal**

evaluation of, in response to mild perianesthetic hypothermia in humans (CI) [Sessler, Rubinstein & Moayeri], 594

**swallowing**

effects of partial paralysis on, in conscious humans (CI) [Isono, Ide, Kochi, Mizuguchi & Nishino], 980

**Regional anesthesia, *See under* Anesthesia**

**Relaxants, *See under* Neuromuscular relaxants**

**Reports of Scientific Meetings, *See under* Organizations**

**Research**

**"operator syndrome"**

ethics in publication and (CO) [Knill], 545

ethics in publication and (CO) [Smith, Miller, Saidman & Morgan], 545

**Respiratory complications, *See under* Complications**

**Respiratory depression, *See under* Complications**

**Respiratory failure, *See under* Lung(s)**

**Ropivacaine, *See under* Anesthetics, local**

**S**

**Sarcolemma, *See under* Muscle, cardiac**

**Sarcoplasmic reticulum, *See under* Heart**

**Scopolamine, *See under* Parasympathetic nervous system**

**Sensitization, *See under* Nerve(s)**

**Serotonin, *See under* Brain, neurotransmitters**

**5-hydroxytryptamine**

in study of bronchodilation and airway epithelium (LI) [Sayiner, Lorenz, Warner & Rehder], 75

**Sevoflurane, *See under* Anesthetics, volatile**

**Shivering, *See under* Temperature, thermoregulation**

**Shock**

**hemorrhagic**

resuscitation from, with hypertonic saline, cerebral blood flow following (LI) [Prough, Whitley, Taylor, Deal & DeWitt], 319

**hypertonic saline**

regional cerebral blood flow following resuscitation from hemorrhagic shock with (LI) [Prough, Whitley, Taylor, Deal & DeWitt], 319

**Sinus bradycardia, *See under* Complications**

**Sinus node, *See under* Heart**

**Skin**

**blood flow**

hyperventilation reduces (CI) [Barker, Hyatt, Clarke & Tremper], 619

**temperature**

measurement of, in evaluation of physiologic responses to mild perianesthetic hypothermia in humans (CI) [Sessler, Rubinstein & Moayeri], 594

**Skin temperature, *See under* Temperature**

**Sleep**

and isoflurane and circadian cycles (CI) [Sessler, Lee & McGuire], 985

**Smooth muscle, *See under* Muscle**

**Sodium, *See under* Ions**

**Somatosensory evoked potentials, *See under* Monitoring**

**Sonomicrometry, *See under* Measurement techniques**

**Spasms, *See under* Complications**

**Spasticity, *See under* Reflexes**

**Spinal anesthesia, *See under* Anesthetic techniques**

**Spinal cord**

**arachnoid mater**

and spinal nerve root sleeve permeability (LI) [Bernards & Hill], 827

**dura mater**

and spinal nerve root sleeve permeability (LI) [Bernards & Hill], 827

**meninges**

and spinal nerve root sleeve permeability (LI) [Bernards & Hill], 827

**permeability**

and spinal nerve root sleeve permeability (LI) [Bernards & Hill], 827

**pia mater**

and spinal nerve root sleeve permeability (LI) [Bernards & Hill], 827

**spinal nerve root sleeve**

permeability (LI) [Bernards & Hill], 827

**subarachnoid space**

and ketamine and midazolam neurotoxicity in rabbit (LI) [Malinovsky, Cozian, Lepage, Mussini, Pinaud & Souron], 91

**substance P**

and isoflurane and dexmedetomidine (LI) [Savola, Woodley, Maze & Kendig], 489

injury to, prior to neurectomy alters pattern of autonomy in rats (LI) [Katz, Vaccarino, Coderrec & Melzack], 876

**Spinal nerve root sleeve, See under Spinal cord**

**Spinal permeability, See under Spinal cord**

**Spinal reflexes, See under Reflexes**

**Spinal surgery, See under Surgery**

**Spine, See under Anatomy**

complications of, *See under Complications*

**Splanchnic nerve activity, See under Gastrointestinal tract**

**Spontaneous breathing, See under Ventilation**

**Spontaneous ventilation, See under Ventilation**

**Sprotte needle, See under Equipment, needle(s)**

**ST-91, See under Sympathetic nervous system**

**Strabismus, See under Surgery**

**Streptozocin, See under Metabolism**

**ST-segment elevation, See under Monitoring, electrocardiography**

**Stump pressure, See under Monitoring**

**Stylets, See under Equipment**

**Subarachnoid space, See under Spinal cord**

**Subdural mass, See under Brain**

**Substance P, See under Spinal cord**

**Succinylcholine, See under Neuromuscular relaxants**

**Sudden asystole, See under Complications**

**Sufentanil, See under Analgesics, opioid**

**Surgery****abdominal aortic**

combined epidural and general *versus* general anesthesia for (CI) [Baron, Bertrand, Barré, Godet, Mundler, Coriat & Viars], 611

**cardiac****aortic dissection**

during cardiac surgery, transesophageal echocardiographic diagnosis of (CR) [Troianos, Savino & Weiss], 149

**cardiopulmonary bypass**

air entrainment during (CO) [Brobst-Lane], 1120

air entrainment during (CO) [Quinn], 1120

aprotinin for, mechanism of action of (CO) [Allison & Whitten], 377

aprotinin for, mechanism of action of (CO) [Dietrich, Richter, Schramm & Spannagl], 378

aprotinin for, mechanism of action of (CO) [Merle, Lançon, Dutrillaux, Obadia & Caillard], 379

blood gas management during (LI) [Hindman, Funatsu, Harrington, Cutkomp, Dexter, Todd & Tinker], 662

and cerebral blood flow response to carbon dioxide during hypothermic bypass (LI) [Hindman, Funatsu, Harrington, Cutkomp, Dexter, Todd & Tinker], 662

little risk of hyperosmolar coma following hyperglycemia during (CO) [Alberti], 913

little risk of hyperosmolar coma following hyperglycemia during (CO) [Hirsch & White], 912

little risk of hyperosmolar coma following hyperglycemia during (CO) [Metz], 912

normal parathyroid hormone responses to hypocalcemia during (CI) [Robertie, Butterworth, Royster, Preilipp, Dudas, Black, Cole & Zaloga], 43

in patient with factor XII deficiency (CR) [Salmenperä, Rasi & Mattila], 539

pharmacokinetics of amrinone during (CI) [Bailey, Levy, Rogers, Szlam & Hug], 961

platelet activation and aggregation during (CI) [Rinder, Bohner, Rinder, Mitchell, Ault & Hillman], 388

platelet adhesion receptor changes during (CI) [Rinder, Mathew, Rinder, Bonan, Ault & Smith], 563

prevention of heparin/protamine complications during (LI) [Yang, Port, Kim, Teng, Till & Wakefield], 288

should calcium be administered prior to separation from (CO) [Butterworth, Royster, Prielipp & Zaloga], 1121

should calcium be administered prior to separation from (CO) [Hosking], 1121

ST-segment elevation during (CR) [Whitten, Latson, Cochran, Elmore & Griffin], 161

**coronary artery bypass graft**

assessment of myocardial perfusion during, with two-dimensional transesophageal contrast echocardiography (CI) [Aranson, Lee, Wiencek, Feinstein, Roizen, Karp & Ellis], 433

pressure-rate quotient in patients undergoing (CO) [Buffington], 710

pressure-rate quotient in patients undergoing (CO) [Gordon, Urban, O'Connor & Barash], 711

**vascular**

right- and left-arm blood pressure discrepancies in (CI) [Frank, Norris, Christopherson & Beattie], 457

blood conservation techniques and platelet function (CI) [Boldt, Zickmann, Czeke, Herold, Dapper & Hempelmann], 426

heart block during anesthesia in: effect of scopolamine *versus* ischemia of AV node (CR) [Park & Lowenstein], 367

**cardiovascular****extracorporeal circulation**

and successful defibrillation with near-simultaneous orthogonal discharges (CR) [Horrow & Pharo], 362

**carotid endarterectomy**

monitoring electrophysiologic function during (CI) [Lam, Manninen, Ferguson & Nantau], 15

**complications**

high-risk procedures, general *versus* "balanced" general anesthesia for (CI) [Baron, Bertrand, Barré, Godet, Mundler, Coriat & Viars], 611

**laryngeal****cricothyroidotomy**

in management of difficult adult airway (MI) [Benumof], 1087

**laryngoscopy**

in management of difficult adult airway (MI) [Benumof], 1087

**pediatric****preoperative preparation**

and prevalence and detection of anemia (CI) [Hackmann, Steward & Sheps], 27

**pericardiectomy**

intraoperative echocardiography to evaluate ventricular filling dynamics during (CR) [Hogue, Platin, Barzilay & Kaiser], 701

**spine**

in prone position, quadriplegia in patient with cervical spondylosis after (CR) [Deem, Shapiro & Marshall], 527

**strabismus**

effect of propofol on postoperative vomiting after (CI) [Watcha, Simeon, White & Stevens], 204

**thyroid**

should laryngeal mask be routinely used in patients undergoing? (CO) [Charters, Cave-Bigley & Roysam], 918

- should laryngeal mask be routinely used in patients undergoing?  
(CO) [Tanigawa, Inoue & Iwata], 919
- transplantation**  
hepatic  
effect of dopamine on renal function in (CI) [Swygert, Roberts,  
Valek, Brajtford, Brown, Gunning, Paulsen & Ramsay], 571  
foreign bodies produced by, risk of tracheal aspiration of (CO)  
[Hitt & Doblar], 915  
"do-not-resuscitate" orders during (CO) [Daly & Seravalli],  
709  
"do-not-resuscitate" orders during (CO) [Truog], 710
- Swallowing reflex, See under Reflexes**
- Swine, See under Animals**
- Sympathetic nervous system**  
**adrenergic agonists**  
does magnesium sulfate alter maternal cardiovascular response  
to? (LI) [Sipes, Chestnut, Vincent, Weiner, Thompson &  
Chatterjee], 1010  
 **$\alpha_1$ -adrenergic agonists**  
cirazoline  
effect of, on dexmedetomidine (LI) [Guo, Tinklenberg, Olikier  
& Maze], 252  
phenylephrine  
effect of, on dexmedetomidine (LI) [Guo, Tinklenberg, Olikier  
& Maze], 252  
 **$\alpha_1$ -adrenergic antagonists**  
doxazosin  
blocks cirazoline's attenuating effect on dexmedetomidine-in-  
duced hypnosis (LI) [Guo, Tinklenberg, Olikier & Maze],  
252  
 **$\alpha_2$ -adrenergic agonists**  
atipamezole  
and effect of dexmedetomidine on arrhythmias (LI) [Hayashi,  
Sumikawa, Maze, Yamatodani, Kamibayashi, Kuro &  
Yoshiya], 113  
clonidine  
epidural, and fentanyl in postoperative patients (CI) [Rostaing,  
Bonnet, Levron, Vodinh, Pluskwa & Saada], 420  
site of hemodynamic effects of (CO) [De Kock], 715  
dexmedetomidine  
and arrhythmias (LI) [Hayashi, Sumikawa, Maze, Yamatodani,  
Kamibayashi, Kuro & Yoshiya], 113  
effects of, on systemic and coronary hemodynamics in  
conscious dogs (LI) [Schmeling, Kampine, Roerig & Warl-  
tier], 499  
 $\alpha_1$  adrenoceptor stimulation antagonizes hypnotic response to  
(LI) [Guo, Tinklenberg, Olikier & Maze], 252  
improves neurologic outcome from incomplete ischemia in rat  
(LI) [Hoffman, Kochs, Werner, Thomas & Albrecht], 328  
influence of, on human liver microsomal alfentanil metabolism  
(LR) [Kharasch, Hill & Eddy], 520  
and heart rate in response to intravenous atropine in humans (CI)  
[Nishikawa & Dohi], 217  
L-659,066  
and effect of dexmedetomidine on arrhythmias (LI) [Hayashi,  
Sumikawa, Maze, Yamatodani, Kamibayashi, Kuro &  
Yoshiya], 113  
influence of, on human liver microsomal alfentanil metabolism  
(LR) [Kharasch, Hill & Eddy], 520  
 **$\alpha$ -adrenergic receptor agonists**  
dexmedetomidine  
isoflurane and, in spinal cord (LI) [Savola, Woodley, Maze &  
Kendig], 489  
 **$\alpha_2$  agonists**  
clonidine  
intravenous, postoperative analgesia by (CI) [Bernard, Hom-  
meril, Passuti & Pinaud], 577  
 **$\alpha_2$  antagonists**  
atipamezole  
in study of dexmedetomidine and cerebral ischemia (LI) [Hoff-  
man, Kochs, Werner, Thomas & Albrecht], 328  
**autonomic blockade**  
effects of, on systemic and coronary hemodynamics in conscious  
dogs (LI) [Schmeling, Kampine, Roerig & Warltier], 499  
**catecholamines**  
epinephrine  
arrhythmia thresholds in dogs anesthetized with thiopental-ha-  
lothane (LI) [Woehick, Rusy & Altee], 884  
arrhythmias induced by, dexmedetomidine prevents (LI)  
[Hayashi, Sumikawa, Maze, Yamatodani, Kamibayashi,  
Kuro & Yoshiya], 113  
arrhythmias induced by, mechanism of antiarrhythmic effect of  
dexmedetomidine on (CO) [Eisenach], 1116  
arrhythmias induced by, mechanism of antiarrhythmic effect of  
dexmedetomidine on (CO) [Hayashi & Sumikawa], 1116  
arrhythmias induced by, propofol enhancement of (LI) [Ka-  
mibayashi, Hayashi, Sumikawa, Yamatodani, Kawabata &  
Yoshiya], 1035  
assay for, in study of spinal blockade alteration of splanchnic  
organ responsiveness (LI) [Jordan & Miller], 654  
dosage effects of, on cardiopulmonary resuscitation blood flow  
(LI) [Berkowitz, Gervais, Schleien, Koehler, Dean & Trayst-  
man], 1041  
levels of, following alfentanil infusion for postoperative pain  
(CI) [Camu & Debucquoy], 171  
in study of anesthetics and abnormal cardiac electrophysiology  
(LI) [Laszlo, Polic, Kampine, Turner, Atlee & Bosnjak], 847  
in study of volatile anesthetics and their effect on Purkinje  
fiber automaticity (LI) [Laszlo, Polic, Atlee, Kampine &  
Bosnjak], 98  
**neuroblastoma**  
as cause for hemodynamic instability during hepatic tumor re-  
section (CO) [Riegler, Hirshberg & Ternberg], 381  
**norepinephrine**  
clearance  
with propofol and halothane (LI) [Deegan, BingHe, Wood &  
Wood], 481  
levels of, following alfentanil infusion for postoperative pain  
(CI) [Camu & Debucquoy], 171  
spillover  
with propofol and halothane (LI) [Deegan, BingHe, Wood &  
Wood], 481  
phenylephrine  
dosage effects of, on cardiopulmonary resuscitation blood flow  
(LI) [Berkowitz, Gervais, Schleien, Koehler, Dean & Trayst-  
man], 1041  
does magnesium sulfate alter maternal cardiovascular response  
to? (LI) [Sipes, Chestnut, Vincent, Weiner, Thompson &  
Chatterjee], 1010  
in study of volatile anesthetics and their effect on Purkinje  
fiber automaticity (LI) [Laszlo, Polic, Atlee, Kampine &  
Bosnjak], 98  
**clonidine**  
and heart rate in response to intravenous atropine in humans (CI)  
[Nishikawa & Dohi], 217

**D-medetomidine**

hemodynamic actions of (LI) [Schmeling, Kampine, Roerig & Warltier], 499

**dopamine**

intraoperative low-dose, effect of, on renal function in liver transplant recipients (CI) [Swygert, Roberts, Valek, Brajtford, Brown, Gunning, Paulsen & Ramsay], 571

**dopamine receptors**

and spastic torticollis during general anesthesia (CR) [Stemp & Taswell], 365

**L-medetomidine**

effects of, on systemic and coronary hemodynamics in conscious dogs (LI) [Schmeling, Kampine, Roerig & Warltier], 499

**ST-91**

does magnesium sulfate alter maternal cardiovascular response to? (LI) [Sipes, Chestnut, Vincent, Weiner, Thompson & Chatterjee], 1010

**sympatholytic agents****amiodarone**

electrophysiologic effects of, on canine Purkinje fibers (LI) [Gallagher], 106

**T****Temperature****brain, See under Brain****hypothermia**

during cardiopulmonary bypass, cerebral blood flow response to (LI) [Hindman, Funatsu, Harrington, Cutkomp, Dexter, Todd & Tinker], 662

**measurement****skin**

in evaluation of physiologic responses to mild perianesthetic hypothermia in humans (CI) [Sessler, Rubinstein & Moayeri], 594

**regulation**

and central thermoregulatory inhibition by general anesthesia (EV) [Sessler], 557

in preoptic region of anterior hypothalamus, effect of halothane on (LI) [Poterack, Kampine & Schmeling], 625

**thermoregulation****shivering**

in response to mild perianesthetic hypothermia in humans (CI) [Sessler, Rubinstein & Moayeri], 594

circadian temperature cycles in humans, isoflurane anesthesia and (CI) [Sessler, Lee & McGuire], 985

**Tension time index, See under Heart****Testing****preoperative**

automated interview in, *versus* personal interview (CI) [Lutner, Roizen, Stocking, Thisted, Kim, Duke, Pompei & Cassel], 394

**Tetanus, See under Infection****Tetracaine, See under Anesthetics, local****Tetraethylammonium, See under Nerve(s), potassium channel blockade****Tetralogy of Fallot, See under Complications****Tetrodotoxin, See under Ions, calcium blockers****Thermodilution, See under Measurement techniques****Thermoregulation, See under Temperature****Thiamylal, See under Anesthetics, intravenous****Thiopental, See under Anesthetics, intravenous****Thoracic anesthesia, See under Anesthesia****Thromboplastin time**

activated partial, *See under Measurement techniques*

**Thromboxane, See under Hormones, prostaglandins; Metabolism****Thromboxane A<sub>2</sub>, See under Hormones****Thyroid surgery, See under Surgery****Tocolytic agents, See under Pharmacology****Tolerance, See under Potency, analgesic****Tonometry, See under Blood pressure; Measurement techniques****Torticollis, See under Complications****Toxicity****cardiac**

cocaine-induced, treatment of (CO) [Nahas], 544

**neurotoxicity**

and blockade by n-butyl-p-aminobenzoate in intractable cancer pain (CI) [Korsten, Ackerman, Grouls, van Zundert, Bon, Bal, Crommelin, Ribot, Hoefsloot & Sloff], 950

produced by ketamine and midazolam in rabbit (LI) [Malinovsky, Cozian, Lepage, Mussini, Pinaud & Souron], 91

**Tracheal extubation, See under Airway; Complications****Tracheal intubation, See under Anesthetic techniques; Intubation****Tracheal stenosis, See under Airway****Tracheostomy, See under Ventilation, artificial****Transesophageal echocardiography, See under Monitoring****Transfusion****cell saver**

and platelet function in cardiac surgery (CI) [Boldt, Zickmann, Czeke, Herold, Dapper & Hempelmann], 426

**Transmucosal anesthesia, See under Anesthetic techniques****Transplantation, See under Surgery**

lung, *See under Lung(s)*

**Tryptase, See under Immune response, anaphylactoid****Tuohy-Borst adapter, See under Equipment****Tympanic membrane, See under Ear****U****U46619, See under Metabolism****Ultrasonography, See under Measurement techniques****Univent® tube, See under Equipment****Urologic anesthesia, See under Anesthesia****V****Vascular pressures, See under Heart****Vascular resistance, See under Lung(s)****Vascular smooth muscle, See under Muscle****Vasoconstriction, See under Blood vessels****Vasopressin, See under Hormones, antidiuretic****Vecuronium, See under Neuromuscular relaxants****Venoconstriction, See under Lung(s)****Venous admixture, See under Lung(s)****Ventilation****airway pressure**

after three sufentanil-pancuronium induction sequences (CI) [Horrow, Abrams, Van Riper, Lambson & Storella], 969

**apnea**

and epidural nalbuphine or morphine after thoracotomy (CI) [Etches, Sandler & Lawson], 9

**artificial****tracheostomy**

in management of difficult adult airway (MI) [Benumof], 1087

- breathing**
    - spontaneous
      - mechanisms of diaphragm displacement during (CO) [Sprung & Rodarte], 916
  - breathing pattern**
    - and volatile anesthetics in anesthetized humans (CI) [Nishino, Tanaka, Ishikawa & Hiraga], 441
  - controlled**
    - intraoperative, right-to-left intracardiac shunt induced by (CR) [Jaffe, Pinto, Schnittger & Brock-Utne], 153
  - inspiratory pressure support**
    - and ventilation-perfusion ratios in obstructive pulmonary disease (CI) [Beydon, Cinotti, Rekik, Radermacher, Adnot, Meignan, Harf & Lemaire], 730
  - manual**
    - of lungs of infants, pediatric anesthesiologist and (EV) [Steward], 555
  - mechanical**
    - pressure support
      - and work of breathing caused by endotracheal tube (CI) [Brochard, Rua, Lorino, LeMaire & Harf], 739
    - intraoperative, right-to-left intracardiac shunt induced by (CR) [Jaffe, Pinto, Schnittger & Brock-Utne], 153
    - and ventilation-perfusion ratios in obstructive pulmonary disease (CI) [Beydon, Cinotti, Rekik, Radermacher, Adnot, Meignan, Harf & Lemaire], 730
  - neonate**
    - and anesthesiologists assessment of changes in neonatal pulmonary compliance by "educated hand" (LR) [Spears, Yeh, Fisher & Zwass], 693
  - one lung, See under Anesthetic techniques**
  - pattern**
    - and epidural nalbuphine or morphine after thoracotomy (CI) [Etches, Sandler & Lawson], 9
  - positive end-expiratory pressure**
    - intraoperative, right-to-left intracardiac shunt induced by (CR) [Jaffe, Pinto, Schnittger & Brock-Utne], 153
  - spontaneous**
    - via transtracheal large-bore intravenous catheters is possible (CR) [Dallen, Wine & Benumof], 531
  - spontaneous breathing**
    - and ventilation-perfusion ratios in obstructive pulmonary disease (CI) [Beydon, Cinotti, Rekik, Radermacher, Adnot, Meignan, Harf & Lemaire], 730
  - Ventilation-perfusion ratios, See under Lung(s)**
  - Ventilation-perfusion relationships, See under Lung(s)**
  - Ventilatory response, See under Carbon dioxide**
  - Ventricular tachycardia, See under Heart**
  - Verapamil, See under Pharmacology, calcium antagonists**
  - Vitamins**
    - calcitriol
      - in response to hypocalcemia during cardiopulmonary bypass (CI) [Robertie, Butterworth, Royster, Preilipp, Dudas, Black, Cole & Zaloga], 43
  - Vomiting, See under Complications**
- W
- Wall motion abnormality, See under Heart**
- X
- Xenon, See under Anesthetics, gases**

STATEMENT OF OWNERSHIP, MANAGEMENT AND CIRCULATION (Act of August 12, 1970: Section 3685, Title 39 United States Code) Date of Filing—October 1, 1991, Title of Publication—Anesthesiology; Frequency of Issue—Monthly; Annual Subscription Price—\$105.00; Location of Known Office of Publication—100 Insurance Way, Suite 114, Hagerstown, MD 21740; Location of the Headquarters or General Business Offices of the Publisher—J. B. Lippincott Company, 227 East Washington Square, Philadelphia, PA 19106; Publisher—American Society of Anesthesiologists, Inc., 515 Busse Highway, Park Ridge, IL 60068; Editor—Lawrence J. Saidman, M.D., Anesthesiology, 0815, University of California—San Diego, 9500 Gilman Drive, La Jolla, CA 92093-0815; Managing Editor—Lynda Krumholz, 227 East Washington Square, Philadelphia, PA 19106; Owner—American Society of Anesthesiologists, Inc., 515 Busse Highway, Park Ridge, IL 60068; Known Bondholders, Mortgagees, and other security holders owning or holding 1 percent or more of total amount of bonds, mortgages, or other securities—None. A. Total no. copies printed (*net press run*), average 39,523, actual 38,000; B. Paid circulation 1. Sales through dealers and carriers, street vendors and counter sales, average none, actual none; 2. Mail subscriptions, average 36,337, actual 36,360; C. Total paid circulation, average 36,337, actual 36,360; D. Free distribution by mail, carrier or other means. Samples, complimentary, and other free copies, average 570, actual 427. E. Total distribution (*sum of C and D*), average 36,907, actual 35,787; F. Copies not distributed 1. Office use, leftover, unaccounted, spoiled after printing, average 2,616, actual 2,213, 2. Returns from news agents, none; G. Total (*sum of E & F—should equal net press runs shown in A*), average 39,523, actual 38,000. I certify that the statements made by me above are correct and complete. J. Lippincott, Publisher.
